# 1 Gene Regulatory Network Reconfiguration in Direct Lineage Reprogramming

2

3 Kenji Kamimoto<sup>1,2,3</sup>, Mohd Tayyab Adil<sup>1,2,3</sup>, Kunal Jindal<sup>1,2,3</sup>, Christy M. Hoffmann<sup>1,2,3</sup>, Wenjun  
4 Kong<sup>1,2,3,4</sup>, Xue Yang<sup>1,2,3</sup>, and Samantha A. Morris<sup>1,2,3,\*</sup>.

5

6 <sup>1</sup>Department of Developmental Biology; <sup>2</sup>Department of Genetics; <sup>3</sup>Center of Regenerative  
7 Medicine. Washington University School of Medicine in St. Louis. 660 S. Euclid Avenue, Campus  
8 Box 8103, St. Louis, MO 63110, USA. <sup>4</sup>Current address: Calico Life Sciences  
9 LLC. \*Correspondence: s.morris@wustl.edu

10

## 11 Summary

12 In direct lineage reprogramming, transcription factor (TF) overexpression reconfigures Gene  
13 Regulatory Networks (GRNs) to convert cell identities between fully differentiated cell types. We  
14 previously developed CellOracle, a computational pipeline that integrates single-cell  
15 transcriptome and epigenome profiles to infer GRNs. CellOracle leverages these inferred GRNs  
16 to simulate gene expression changes in response to TF perturbation, enabling network re-  
17 configuration during reprogramming to be interrogated *in silico*. Here, we integrate CellOracle  
18 analysis with lineage tracing of fibroblast to induced endoderm progenitor (iEP) conversion, a  
19 prototypical direct lineage reprogramming paradigm. By linking early network state to  
20 reprogramming success or failure, we reveal distinct network configurations underlying different  
21 reprogramming outcomes. Using these network analyses and *in silico* simulation of TF  
22 perturbation, we identify new factors to coax cells into successfully converting cell identity,  
23 uncovering a central role for the AP-1 subunit Fos with the Hippo signaling effector, Yap1.  
24 Together, these results demonstrate the efficacy of CellOracle to infer and interpret cell-type-  
25 specific GRN configurations at high resolution, providing new mechanistic insights into the  
26 regulation and reprogramming of cell identity.

27

28 **Keywords:** Gene perturbation simulation; cell fate prediction; gene regulatory networks;  
29 machine learning; direct lineage reprogramming; single-cell analysis

30

## 31 Introduction

32 Advances over the past half-century, such as nuclear transfer (Gurdon et al., 1958) and  
33 factor-mediated reprogramming (Takahashi and Yamanaka, 2006), have revealed the remarkable  
34 plasticity of cell identity. Cells reprogrammed to pluripotency can be directed to differentiate

35 toward desired target populations by recapitulating embryonic development *in vitro*, although this  
36 approach is inefficient and produces heterogeneous populations of developmentally immature  
37 cells. “Direct lineage reprogramming” aims to directly transform cell identity between fully  
38 differentiated somatic states via the forced expression of select transcription factors (TFs). Using  
39 this approach, fibroblasts have been directly converted into many clinically valuable cell types  
40 (Cohen and Melton, 2011). These protocols are currently limited because only a fraction of cells  
41 convert to the target cell type and remain developmentally immature or incompletely specified  
42 (Morris and Daley, 2013). Therefore, the resulting cells are generally unsuitable for therapeutic  
43 application and have limited utility for disease modeling and drug screening *in vitro*, where fully  
44 differentiated and functional cells are highly sought-after.

45 Gene Regulatory Networks (GRNs) represent the complex, dynamic molecular  
46 interactions that act as critical determinants of cell identity. These networks describe the intricate  
47 interplay between transcriptional regulators and multiple cis-regulatory DNA sequences, resulting  
48 in the precise spatial and temporal regulation of gene expression (Davidson and Erwin, 2006).  
49 Systematically delineating GRN structures enables a logic map of regulatory factor cause-effect  
50 relationships to be mapped (Materna and Davidson, 2007). In turn, this knowledge supports a  
51 better understanding of how cell identity is determined and maintained, informing new strategies  
52 for cellular reprogramming to support disease modeling or cell-based therapeutic approaches.

53 We previously described CellOracle, a computational pipeline for GRN inference via the  
54 integration of different single-cell data modalities (Kamimoto et al., 2020). CellOracle overcomes  
55 current challenges in GRN inference by using single-cell transcriptomic and chromatin  
56 accessibility profiles, integrating prior biological knowledge via regulatory sequence analysis to  
57 infer transcription factor (TF)-target gene interactions. Moreover, we designed CellOracle to apply  
58 inferred GRNs to simulate gene expression changes in response to TF perturbation. This unique  
59 feature enables inferred GRN configurations to be interrogated *in silico*, facilitating their  
60 interpretation. We have benchmarked CellOracle against ground-truth TF-gene interactions,  
61 demonstrating its efficacy to recapitulate known regulatory changes across hematopoiesis  
62 (Kamimoto et al., 2020). Further, we have applied CellOracle to predict TFs regulating medium  
63 spiny neuron maturation in human fetal striatum development (Bocchi et al., 2021). Other groups  
64 have successfully used the method to investigate mouse and human T-cell differentiation (Chopp  
65 et al., 2020; Nie et al., 2022), T-cell dysfunction in glioblastoma (Ravi et al., 2022), and pharyngeal  
66 organ development (Magaletta et al., 2022).

67 Here, we apply CellOracle to interrogate GRN reconfiguration during the direct lineage  
68 reprogramming of fibroblasts to induced endoderm progenitors (iEPs), a prototypical TF-mediated

69 fate conversion protocol. Via single-cell resolution lineage tracing, we previously demonstrated  
70 that this protocol comprises two distinct trajectories leading to reprogrammed and dead-end  
71 states (Biddy et al., 2018). In this study, we expand on this lineage tracing strategy to  
72 experimentally define state-fate relationships, supporting the inference of early network states  
73 associated with defined reprogramming outcomes. These analyses reveal the early GRN  
74 configurations associated with the successful conversion of cell identity. Using principles of graph  
75 theory to identify critical nodes in conjunction with *in silico* simulation predicts several novel  
76 regulators of reprogramming. We experimentally validate these predictions via experimental TF  
77 perturbation: knockdown, overexpression, and Perturb-seq-based knockout. We also  
78 demonstrate that one of these TFs, *Fos*, plays roles in both iEP reprogramming and maintenance,  
79 where interrogation of inferred *Fos* targets reveals a putative role for AP1-Yap1 in fibroblast to  
80 iEP conversion. We experimentally validate these findings to demonstrate that *Fos* and *Yap1*  
81 overexpression significantly enhances reprogramming efficiency. Together, these results  
82 demonstrate the efficacy of CellOracle to infer and interpret cell-type-specific GRN configurations  
83 at high resolution, enabling new mechanistic insights into the regulation and reprogramming of  
84 cell identity. CellOracle code and documentation are available at  
85 <https://github.com/morris-lab/CellOracle>.

86

## 87 **Results**

### 88 **CellOracle GRN Inference applied to direct lineage reprogramming**

89 CellOracle is designed to infer GRN configurations to reveal how networks are rewired  
90 during the establishment of defined cellular identities and states, highlighting known and putative  
91 regulatory factors of fate commitment. CellOracle overcomes population heterogeneity by  
92 leveraging single-cell genomic data, enabling accurate inference of the GRN dynamics underlying  
93 complex biological processes (Kamimoto et al., 2020). In the first step of the CellOracle pipeline,  
94 single-cell chromatin accessibility data (scATAC-seq) is used to assemble a 'base' GRN structure,  
95 representing a list of all potential regulatory genes associated with each defined DNA sequence.  
96 This step leverages the transcriptional start site (TSS) database  
97 (<http://homer.ucsd.edu/homer/ngs/annotation.html>) and Cicero, an algorithm that identifies co-  
98 accessible scATAC-seq peaks (Pliner et al., 2018), to identify accessible promoters/enhancers.  
99 The DNA sequence of these regulatory elements is then scanned for TF binding motifs, repeating  
100 this task for all regulatory sequences, to generate a base GRN structure of all potential regulatory  
101 interactions (**Figure 1A, B**).

102           The second step in the CellOracle pipeline uses scRNA-seq data to convert the base GRN  
103 into context-dependent GRN configurations for each defined cell cluster. Removal of inactive  
104 connections refines the base GRN structure, selecting the active edges representing regulatory  
105 connections associated with a specific cell type or state (**Figure 1C**). For this process, we  
106 leverage regularized machine learning regression models (Camacho et al., 2018), primarily to  
107 select active regulatory genes and to obtain their connection strength (**Figure S1A**). CellOracle  
108 builds a machine learning model that predicts target gene expression from the expression levels  
109 of the regulatory genes identified in the prior base GRN refinement step. After fitting models to  
110 sample data, CellOracle extracts gene-gene connection information by analyzing model  
111 variables. With these values, CellOracle prunes insignificant or weak connections, resulting in a  
112 cell-type/state-specific GRN configuration (**Figure 1D**). Here, we apply CellOracle to infer GRN  
113 reconfiguration during TF-mediated direct lineage reprogramming.

114           We previously investigated mouse embryonic fibroblast (MEF) to induced endoderm  
115 progenitor (iEP) reprogramming, induced via the forced expression of two TFs: *Hnf4 $\alpha$*  and *Foxa1*  
116 (**Figure 1E**; (Bidy et al., 2018; Morris et al., 2014)). iEP generation represents a prototypical  
117 lineage reprogramming protocol, which, like most conversion strategies, is inefficient and lacks  
118 fidelity. Initially reported as hepatocyte-like cells, the resulting cells can functionally engraft the  
119 liver (Sekiya and Suzuki, 2011). However, we demonstrated that these cells also harbor intestinal  
120 identity and can functionally engraft the colon in a mouse model of acute colitis, prompting their  
121 re-designation as iEPs (Guo et al., 2019; Morris et al., 2014). More recently, we have shown that  
122 iEPs transcriptionally resemble injured biliary epithelial cells (BECs) and exhibit BEC-like behavior  
123 in 3D-culture models (Kong et al., 2022). Building on these studies, our single-cell lineage tracing  
124 of this protocol revealed two distinct trajectories arising during MEF to iEP conversion: one to a  
125 successfully reprogrammed state, and one to a dead-end state, where cells fail to fully convert to  
126 iEPs (Bidy et al., 2018). Although we identified factors to improve the efficiency of  
127 reprogramming, mechanisms of cell fate conversion from the viewpoint of GRN reconfiguration  
128 remain unknown.

129           Our previously published MEF to iEP reprogramming scRNA-seq dataset consists of eight  
130 time points collected over 28 days ( $n = 27,663$  cells) (Bidy et al., 2018). We reprocessed this  
131 dataset using partition-based graph abstraction (PAGA; (Wolf et al., 2019)), manually annotating  
132 15 clusters based on marker gene expression and PAGA connectivity (**Figure 1F**; **S1B-D**). After  
133 successfully initiating conversion, cells diverge down one of two trajectories: one leading to a  
134 successfully reprogrammed state, and one to a dead-end state. Relative to reprogrammed cells,  
135 dead-end cells only weakly express iEP markers, *Cdh1*, and *Apoa1*, accompanied by higher

136 expression levels of fibroblast marker genes, such as *Col1a2* (**Figure 1F; S1B, C**). Using  
137 CellOracle, we inferred GRN configurations for each cluster, calculating network connectivity  
138 scores to analyze GRN dynamics during lineage reprogramming.

139

#### 140 **Analysis of network reconfiguration during reprogramming**

141 We initially assess the network configuration associated with the exogenous  
142 reprogramming TFs, *Hnf4 $\alpha$*  and *Foxa1*, focusing on the strength of their connections to target  
143 genes. *Hnf4 $\alpha$*  and *Foxa1* receive a combined score in these analyses since they are expressed  
144 as a single transcript that produces two independent factors via 2A-peptide-mediated cleavage  
145 (Liu et al., 2017). Network strength scores show significantly stronger connectivity of *Hnf4 $\alpha$ -Foxa1*  
146 to its inferred target genes in the early stages of reprogramming, followed by decreasing  
147 connection strength in later conversion stages (Early\_2 vs. iEP\_2:  $P < 0.001$ , Wilcoxon Test;  
148 **Figure 1G**). We next evaluated the inferred GRN structures using traditional graph theory  
149 methods. We examined: 1) Degree centrality of each gene, a straightforward measure reporting  
150 how many edges are connected to a node directly; 2) Eigenvector centrality, a measure of  
151 influence via connectivity to other well-connected genes (Klein et al., 2012). *Hnf4 $\alpha$ -Foxa1*  
152 receives high degree centrality and eigenvector centrality scores in the early phases of lineage  
153 conversion, gradually decreasing as reprogramming progresses (**Figure 1H**). In agreement with  
154 a central role for the transgenes early in reprogramming, network cartography analysis (Guimerà  
155 and Amaral, 2005) classified *Hnf4 $\alpha$ -Foxa1* as a prominent "connector hub" in the early\_2 cluster  
156 network configuration (**Figure 1I; S1E**). Together, these analyses reveal that *Hnf4 $\alpha$ -Foxa1*  
157 network configuration connectivity and strength peak in early reprogramming phases.

158 Next, we analyzed the *Hnf4 $\alpha$ -Foxa1* network configuration in later conversion stages,  
159 following bifurcation into reprogrammed and dead-end trajectories (**Figure 1F; S1B-D**). The  
160 reprogrammed clusters (iEP\_0, iEP\_1, iEP\_2) exhibit stronger network connectivity scores,  
161 relative to the dead-end clusters 1 and 2 (**Figure 1G**; iEP vs. Dead-end;  $P < 0.001$ , Wilcoxon  
162 Test). We also identify a smaller dead-end cluster (Dead-end\_0); cells within this cluster only  
163 weakly initiate reprogramming, retaining robust fibroblast gene expression signatures and  
164 expressing significantly lower levels of reprogramming initiation markers such as *Apoa1* (**Figure**  
165 **S1C**;  $P < 0.001$ , permutation test). This cluster also exhibits significantly lower *Hnf4 $\alpha$ -Foxa1*  
166 connectivity scores relative to Dead-end\_1 and 2 (**Figure 1G**;  $P < 0.001$ , Wilcoxon Test;),  
167 accompanied by lower degree centrality and eigenvector centrality scores (**Figure 1H**). However,  
168 CellTag lineage data reveals that the majority of the cells (93% of tracked cells) on this unique

169 path derive from a single clone, representing a rare reprogramming event captured due to clonal  
170 expansion (**Figure S1F**).

171 We next turned to global GRN reconfiguration to identify candidate TFs reprogramming  
172 initiation. Comparing degree centrality scores between fibroblast and early reprogramming  
173 clusters reveals differential connectivity of a handful of key TFs. For example, *Hes1*, *Eno1*, *Fos*,  
174 *Foxq1*, and *Zfp57* receive relatively high degree centrality scores in the early reprogramming  
175 clusters, whereas *Klf2* and *Egr1* degree centrality increases in later transition stages (**Figure 1J**).  
176 These factors remain highly connected on the reprogramming trajectory relative to the dead-end  
177 (**Figure 1K**), suggesting that the GRN configurations controlling reprogramming outcome are  
178 remodeled at initiation.

179 Altogether, the MEF to iEP reprogramming network analysis presented here suggests that  
180 *Hnf4 $\alpha$ -Foxa1* function peaks at conversion initiation. These early, critical changes in GRN  
181 configuration determine reprogramming outcome, with dysregulation or loss of this program  
182 leading to dead-ends, where cells either do not successfully initiate or complete reprogramming.  
183 This hypothesis is consistent with our previous CellTag lineage tracing, showing the  
184 establishment of reprogramming outcomes from early stages of the conversion process (Bidy et  
185 al., 2018). We next performed new experimental lineage tracing to capture cells at reprogramming  
186 initiation to investigate further how early GRN configuration relates to the successful generation  
187 of iEPs.

188

### 189 **Clonal tracing links early network state to reprogramming fate**

190 Barcoding and tracking cells via scRNA-seq represents a powerful method to investigate  
191 how the early molecular state of a cell relates to its eventual fate (Bidy et al., 2018; Weinreb et  
192 al., 2020). Cells are labeled with combinations of heritable random barcodes, CellTags, delivered  
193 using lentivirus, enabling cells to be uniquely labeled and tracked over time; cells sharing identical  
194 barcodes are identified as clonal relatives; thus, early cell state can be directly linked to  
195 reprogramming outcome (Bidy et al., 2018; Kong et al., 2020; **Figure 2A**). However, our previous  
196 lineage tracing study was not designed to maximize the capture of clones early in reprogramming;  
197 thus, the 30-cell minimum requirement of CellOracle for GRN inference was not met. Here, we  
198 performed new lineage tracing experiments to associate early-stage cells with reprogramming  
199 outcome.

200 Cells were reprogrammed with *Hnf4 $\alpha$ -Foxa1*, as above, and CellTagged at the end of the  
201 reprogramming TF transduction period. After four days of expansion (reprogramming day 4), we  
202 collected 25% of the cell population for scRNA-seq, reseeding the remaining cells. A total of

203 24,799 cells were sequenced: 8,440 at day 4, 4,836 at day 10, and 11,523 at day 28 (**Figure 2B**,  
204 **C**). Using our previous method to score cell identity along with established marker gene  
205 expression (Bidy et al., 2018), we identify reprogrammed and dead-end reprogramming  
206 outcomes (reprogrammed  $n = 1,895$ ; dead-end  $n = 6,492$ ; **Figure 2D**; **S2A, B**). Next, using clonal  
207 information, we identify the day 4 clones whose day 10 and day 28 descendants are significantly  
208 enriched or depleted of successfully reprogrammed cells. From CellTag processing (**Methods**),  
209 we recovered 1,158 clones, containing a total of 10,927 cells across all time points. Using  
210 randomized testing, we identified two groups of day 4 iEPs: iEP-enriched (64 cells in 7 clones)  
211 and iEP depleted (59 cells in 39 clones), from which reprogramming and dead-end trajectories  
212 stem (**Figure 2F**), reproducing our earlier observations (Bidy et al., 2018).

213 Pooling the day 4 clones by outcome, we meet the minimum number of cells required for  
214 GRN inference (**Figure S2C**). We first compared the global GRN configurations for each of these  
215 states relative to MEFs, to assess early GRN reconfiguration on each trajectory. For example,  
216 comparing degree centrality between day 4 cells destined to reprogram and native fibroblasts  
217 agrees with our above analysis comparing early transition to fibroblast states (**Figure 1J**),  
218 showing high connectivity of similar factors, such as *Klf6*, *Klf9*, and *Mef2a*, in fibroblasts and *Fos*,  
219 *Egr1*, and *Foxq1* in day 4 reprogrammed destined clones (**Figure 2G, left**). Additional highly-  
220 connected TFs, receiving relatively high degree centrality scores, also emerge in this  
221 reprogramming group, including the known induced pluripotency factor, *Klf4* (Takahashi and  
222 Yamanaka, 2006) in addition to *Klf5*, *Cebpb*, *Mybl2*, and *Foxk2*, amongst other TFs. The  
223 appearance of several additional factors here is likely due to assessing the early cells with known  
224 reprogramming descendants rather than the early reprogramming cluster as a whole, in which  
225 many cells will not successfully reprogram, highlighting how these state-fate experiments can  
226 further dissect population heterogeneity.

227 Indeed, the state-fate experimental design allows us to compare those early cells destined  
228 to reprogram vs. early cells that fail to reprogram, for which clonal information is essential. A  
229 comparison of these two groups reveals subtle differences in GRN configuration that lead to  
230 different reprogramming outcomes, with *Klf6*, *Egr3*, *Tfapb2*, and *Foxs1* demonstrating higher  
231 connectivity in cells failing to fully reprogram, in contrast to *Fos*, *Cebpb*, *Klf5*, and *Junb* in cells  
232 destined to attain full iEP identity (**Figure 2G, right**). Overall, the new experimental state-fate  
233 analysis presented here supports the network analysis of our previous time course, revealing the  
234 highly connected fibroblasts TFs that are decoupled upon reprogramming initiation. These factors  
235 represent potential targets to extinguish fibroblast identity. Further, we identify many TFs that are  
236 highly connected from early stages on the successful reprogramming trajectory, representing

237 potential candidates to improve iEP yield and understand how cell identity is maintained and  
238 respecified more broadly. We next use CellOracle's *in silico* perturbation function to identify  
239 putative regulators of reprogramming in a systematic, unbiased manner.

240

## 241 **Systematic *in silico* simulation of TF knockout to identify novel regulators of iEP** 242 **reprogramming**

243 While network structure can point to how gene regulation changes during reprogramming,  
244 it offers a static picture that does not necessarily provide functional insight. CellOracle bridges  
245 this gap by using its unique GRN inference model to interrogate networks to gain mechanistic  
246 insight into how specific TFs regulate cell identity (Kamimoto et al., 2020). CellOracle simulates  
247 the transition of cell identity following candidate TF perturbation (knockout or overexpression),  
248 using cluster-specific GRNs to model subsequent expression changes in regulated genes. The  
249 simulated values are then converted into a transition vector map and visualized in the dimensional  
250 reduction space, enabling an intuitive interpretation of how a candidate TF regulates cell identity  
251 (Kamimoto et al., 2020); **Figure 3A-C; S3A-C; Methods**). This approach allows factors to be  
252 ranked for further experimental investigation, as detailed below.

253 *In silico* TF perturbation comprises four steps: 1) GRN configurations are constructed (as  
254 in **Figure 1A**); 2) Using these GRN models, shifts in target gene expression in response to TF  
255 perturbation are calculated. This step applies the GRN model as a function to propagate the shift  
256 in gene expression rather than the absolute gene expression value, representing TF-to-target  
257 gene signal flow. This signal is propagated iteratively to calculate the broad, downstream effects  
258 of TF perturbation, allowing the global transcriptional 'shift' to be estimated (**Figure S3A, B**); 3)  
259 The probability of a cell identity transition is estimated by comparing this gene expression shift to  
260 the gene expression of local neighbors (**Figure S3C**); 4) The transition probability is converted  
261 into a weighted local average vector to represent the simulated directionality of cell state transition  
262 for each cell upon candidate TF perturbation. This final step converts the simulation results into a  
263 2D vector map, enabling robust predictions by mitigating the effect of errors or noise derived from  
264 scRNA-seq data and the preceding simulation (**Figure 3B middle; S3C**). The resulting small-  
265 length vectors allow the directionality of cell identity transitions to be feasibly predicted, rather  
266 than interpreting long-ranging terminal effects from initial states.

267 To enable the simulation results to be assessed in a systematic and unbiased manner, we  
268 consider the changes in cell identity induced by reprogramming, together with the predicted  
269 effects from the perturbation. Taking the relatively densely sampled time course from Bidy et al.,  
270 2018, we use semi-supervised Monocle analysis (Trapnell et al., 2014) to order cells in



271 pseudotime based on the expression of the fibroblast marker *Col1a2* and the iEP marker *Apoa1*,  
272 capturing the distinctive reprogramming and dead-end trajectories as distinguished by their  
273 respective lineage restricted-clones (n = 48,515 cells, 2 independent biological replicates; **Figure**  
274 **3A; S3D**). We use the pseudotime information to calculate a vector gradient, representing the  
275 direction of reprogramming as a vector field (**Figure 3B, left; S3E; Methods**). We then quantify  
276 the similarity between the reprogramming and perturbation simulation vector fields by calculating  
277 their inner-product value, which we term ‘perturbation score’ (**Figure 3B**). A negative perturbation  
278 score implies that the TF perturbation blocks reprogramming (**Figure 3C**, shown in magenta).  
279 Conversely, a positive perturbation score indicates that reprogramming is promoted following TF  
280 perturbation (**Figure 3C**, shown in green). By calculating the sum of the negative perturbation  
281 scores, we can rank TFs by their potential to regulate the reprogramming process, where a greater  
282 negative score indicates that reprogramming is impaired upon perturbation of the candidate TF.  
283 Using these metrics, we can interpret perturbation effects on cell fate quantitatively and  
284 objectively.

285 Via this approach, we performed a systematic *in silico* simulation of TF knockouts (KOs)  
286 during iEP generation to identify novel regulators of reprogramming, specifically along the  
287 reprogramming trajectory (**Figure S3F**). Following GRN inference for each of the 7 Monocle  
288 states identified (**Figure S3D**), we performed KO simulations for all TFs with inferred connections  
289 to at least one other gene (‘active’ TFs, n = 180; **Methods**), calculating the sum of the negative  
290 perturbation scores to rank TFs by the predicted inhibition of reprogramming following their KO.  
291 This *in silico* screen allows us to quickly screen 180 candidate TFs, prioritizing factors for  
292 experimental validation. In the top-ranked TFs, many factors are shared between independent  
293 biological replicates, demonstrating the consistency of reprogramming and our analysis ((**Figure**  
294 **3D**; Pearson’s,  $r = 0.72$ ). The *Hnf4α-Foxa1* transgene is ranked top, as expected, since these  
295 factors are driving the reprogramming process. Of the remaining top-ranked factors, only half are  
296 differentially expressed in reprogrammed cells (**Table S1**), highlighting the utility of CellOracle to  
297 recover novel candidate regulators.

298 For experimental validation, we further prioritized candidate genes based on GRN degree  
299 centrality, enrichment of gene expression along the entire reprogramming trajectory, and ranking  
300 agreement across biological replicates. Following this selection step, eight TFs remained: *Eno1*,  
301 *Fos*, *Fosb*, *Foxd2*, *Id1*, *Klf2*, *Klf4*, *Klf15* (**Figure 3E**). For all TFs, CellOracle predicts impaired  
302 reprogramming following their KO. We performed an initial screen for all eight TFs, using a short  
303 hairpin RNA (shRNA)-based strategy to knock down each TF during reprogramming (Confirmed  
304 by qRT-PCR; **Figure S3G**), followed by colony formation assay to quantify clusters of successfully

305 reprogrammed cells based on E-Cadherin expression. From this initial screen, reprogramming  
306 was impaired following the knockdown of 6 of the 8 TFs, with 25-50% fewer colonies formed  
307 (**Figure S3H, I**). We selected *Eno1*, *Fos*, *Fosb*, *Id1*, and *Klf4* for additional colony formation  
308 assays, confirming that their knockdown significantly reduces reprogramming efficiency ( $n = 5$   
309 independent biological replicates for scramble shRNA control, *Fosb*, *Id1*;  $n = 4$  for *Eno1*, *Klf4*;  $n$   
310 = 3 for *Fos*; paired t-test, two-tailed; \* =  $p < 0.05$ ; \*\* =  $p < 0.01$ ; **Figure 3F, G**).

311 Overall, our systematic perturbation simulation and experimental validation revealed  
312 several novel regulators of MEF to iEP reprogramming. Of these TFs, *Fos* appears across  
313 orthogonal analyses and independent datasets as a putative regulator of iEP reprogramming.  
314 Indeed, we noted an enrichment of genes associated with the activator protein-1 TF (AP-1), a  
315 dimeric complex primarily containing members of the *Fos* and *Jun* factor families (Eferl and  
316 Wagner, 2003). AP-1 functions to establish cell-type-specific enhancers and gene expression  
317 programs (Heinz et al., 2010; Vierbuchen et al., 2017) and to reconfigure enhancers during  
318 reprogramming to pluripotency (Knaupp et al., 2017; Madrigal and Alasoo, 2018). As part of the  
319 AP-1 complex, *Fos* plays broad roles in proliferation, differentiation, and apoptosis, both in  
320 development and tumorigenesis (Eferl and Wagner, 2003; Jochum et al., 2001; Velazquez et al.,  
321 2015). We next focused on further *in silico* simulation and experimental validation of *Fos*, a core  
322 component of AP-1.

323

### 324 **The AP-1 transcription factor subunit *Fos* is central to reprogramming initiation and** 325 **maintenance of iEP identity**

326 Comparing degree centrality scores between fibroblast and early reprogramming  
327 clusters, *Fos* receives relatively high degree and eigenvector centrality scores, along with  
328 connector hub classification in the early reprogramming clusters (**Figure 1A; 4A, B; S4A**). Clonal  
329 analysis of early ancestors destined to reprogram successfully agrees with a central role for *Fos*  
330 (**Figure 2; S2**). Indeed, perturbation simulation and reduced reprogramming efficiency following  
331 experimental knockdown (**Figure 3; S3**) lead us to select *Fos* for deeper mechanistic investigation  
332 as a candidate gene playing a critical role in initiating iEP conversion.

333 During MEF to iEP reprogramming, *Fos* is gradually and significantly upregulated (**Figure**  
334 **4C, D**;  $P < 0.001$ , permutation test, one-sided). Several Jun AP-1 subunits are also expressed in  
335 iEPs, classifying as connectors and connector hubs across various reprogramming stages  
336 (**Figure S4C-E**). *Fos* and *Jun* are among a battery of genes reported to be upregulated in a cell-  
337 subpopulation-specific manner in response to cell dissociation-induced stress, potentially leading  
338 to experimental artifacts (van den Brink et al., 2017). Considering this report, we performed qPCR

339 for *Fos* on dissociated and undissociated cells. This orthogonal validation confirms an 8-fold  
340 upregulation ( $P < 0.01$ , *t*-test, one-sided) of *Fos* in iEPs, relative to MEFs, revealing no significant  
341 changes in gene expression in cells that are dissociated and lysed versus cells lysed directly on  
342 the plate (**Figure S4F**). Furthermore, analysis of unspliced and spliced *Fos* mRNA levels reveals  
343 an accumulation of spliced *Fos* transcripts in reprogrammed cells. This observation suggests that  
344 these transcripts accumulated over time rather than by rapid induction of expression in the five-  
345 minute cell dissociation and methanol fixation in our single-cell preparation protocol (**Figure S4G**)  
346 (la Manno et al., 2018).

347 To further investigate the role of *Fos* across reprogramming, we simulated its  
348 overexpression, using MEF to iEP reprogramming time course GRN configurations inferred by  
349 CellOracle (**Figure 1**). In these analyses, to assess the *in silico* perturbation of a specific  
350 candidate, we use a Markov simulation to predict how cell identity shifts within the overall cell  
351 population, visualizing the results as a Sankey diagram (**Methods**). Overexpression simulation  
352 for *Fos* predicts a major cell state shift from the early transition to transition clusters, in addition  
353 to predicting shifts in identity from dead-end to reprogrammed clusters (**Figure 4E**). In contrast,  
354 the simulation of *Fos* KO produces the opposite results. (**Figure 4F**). We experimentally validated  
355 this simulation by adding *Fos* to the iEP reprogramming cocktail. As expected, we see a significant  
356 increase in the number of iEP colonies formed ( $n = 10$ ,  $P < 0.001$ , *t*-test, one-sided; **Figure 4G**),  
357 increasing reprogramming efficiency more than two-fold, accompanied by significant increases in  
358 iEP marker expression as measured by qPCR ( $n = 3$ ,  $P < 0.001$ , *t*-test, one-sided; **Figure 4H**).

359 Turning our attention to the later stages of reprogramming, *Fos* continues to receive  
360 relatively high network scores, particularly for betweenness centrality, in the iEP GRN  
361 configurations (**Figure 4A**). *Fos* also classifies as a Connector Hub (**Figure 4B**) in iEPs,  
362 suggesting a role for *Fos* in the stabilization and maintenance of the reprogrammed state. To test  
363 this hypothesis, we use CellOracle to perform knockout simulations, followed by experimental  
364 knockout validation in an established iEP cell line. Here, we leverage the ability to culture iEPs,  
365 long-term, where they retain a range of phenotypes (from fibroblast-like to iEP states; **Figure**  
366 **S4H**) and functional engraftment potential (Guo et al., 2019; Morris et al., 2014). Simulation of  
367 *Fos* knockout using these long-term cultured iEP GRN configurations predicts the loss of iEP  
368 identity upon factor knockout (**Figure 4I**). To test this prediction, we used a CRISPR-Cas9 based  
369 approach to knock out *Fos* in established iEPs. Quantitative comparison of the cell proportions  
370 between control and knockout groups confirms that fully reprogrammed iEPs regress toward an  
371 intermediate state upon *Fos* knockout, confirming a role for this factor in maintaining iEP identity

372 **(Figure 4J)**, in addition to the establishment of iEPs, as we demonstrate in our systematic  
373 simulation and experimental validation, in Figure 3.

374

### 375 **Fos target inference uncovers a role for the hippo signaling effector Yap1 in** 376 **reprogramming**

377 To gain further insight into the mechanism of how Fos regulates reprogramming, we  
378 interrogated a list of the top 50 inferred *Fos* targets across all stages of reprogramming (**Figure**  
379 **5A; Table S2**). We also assembled a list of genes predicted to be downregulated following *Fos*  
380 knockout simulation for the reprogramming time course (**Figure S5A**). From this analysis, we  
381 noted the presence of direct targets of YAP1, a central downstream transducer of the Hippo  
382 signaling pathway (Galli et al., 2015; Ramos and Camargo, 2012; Stein et al., 2015). These  
383 targets include *Cyr61*, *Amotl2*, *Gadd45g*, and *Ctgf*. Previous associations between Yap1 and Fos  
384 support these observations; for example, YAP1 is recruited to the same genomic regions as FOS  
385 via complex formation with AP-1 (Zanconato et al., 2015). Moreover, AP-1 is required for YAP1-  
386 regulated gene expression and the liver overgrowth caused by Yap overexpression, where FOS  
387 induction contributes to the expression of YAP/TAZ downstream target genes (Koo et al., 2020).

388 Together, this evidence suggests that Fos may play a role in reprogramming via an AP-1-  
389 Yap1-mediated mechanism. Since Yap1 does not directly bind to DNA, we cannot deploy  
390 CellOracle here to perform network analysis or perturbation simulations, highlighting a limitation  
391 of our approach. However, in lieu of these analyses, we again turn to our rich single-cell time  
392 course of iEP reprogramming (Bidy et al., 2018). Using a well-established active signature of  
393 Yap1 (Dong et al., 2007), we find significant enrichment of this signature as reprogramming  
394 progresses (**Figure S5B, C**;  $P < 0.001$ , permutation test, one-sided). Together, these results  
395 suggest a role for the Hippo signaling component Yap1 in reprogramming, potentially effected via  
396 its interactions with Fos/AP-1. Indeed, the hippo signaling axis plays a role in liver regeneration  
397 (Pepe-Mooney et al., 2019; Yimlamai et al., 2014) and regeneration of the colonic epithelium (Yui  
398 et al., 2018), in line with the known potential of iEPs to functionally engraft the liver and intestine  
399 (Guo et al., 2019; Morris et al., 2014; Sekiya and Suzuki, 2011). Further, we have recently  
400 demonstrated that iEPs transcriptionally resemble injured biliary epithelial cells (BECs) (Kong et  
401 al., 2022), the target of YAP signaling in the context of liver regeneration (Pepe-Mooney et al.,  
402 2019).

403 To test the role of Yap1 in iEP reprogramming, we first performed colony formation assays.  
404 We find that the addition of Yap1 to the Hnf4 $\alpha$ -Foxa1 cocktail significantly enhances  
405 reprogramming efficiency, where the addition of Fos and Yap1 together increase colony formation

406 by almost three-fold, accompanied by significant increases in iEP marker expression (**Figure 5B**;  
407 **Figure S5D, E**,  $P < 0.001$ ,  $t$ -test, one-sided). Further, we note the emergence of a unique cell  
408 morphology when Fos and Yap1 are added to the reprogramming cocktail, characterized by the  
409 formation of extremely dense colonies (**Figure 5C**). To further characterize this distinctive  
410 phenotype, we performed scRNA-seq on cells reprogrammed with Hnf4 $\alpha$ -Foxa1 ( $n = 7,414$  cells),  
411 Hnf4 $\alpha$ -Foxa1-Yap1 ( $n = 8,549$  cells), Hnf4 $\alpha$ -Foxa1-Fos ( $n = 8,771$  cells), Hnf4 $\alpha$ -Foxa1-Yap1-Fos  
412 ( $n = 10,507$  cells) and collected at day 20. Cells were clustered using the Leiden clustering  
413 algorithm. Integration was performed using Seurat, and cells were visualized in 2D using UMAP  
414 (**Figure S5F**).

415 We scored cells using established markers of MEFs and iEPs (Bidly et al., 2018),  
416 revealing a significant increase in reprogramming efficiency, particularly following the addition of  
417 Yap1 ( $p < 0.0001$ , Wilcoxon test, **Figure 5F**; **S5F**), which is also accompanied by a reduction in  
418 fibroblast marker expression (**Figure S5G**). We further classify cell identity using our  
419 unsupervised method for cell-type classification, *Capybara* (Kong et al., 2022). In agreement with  
420 our previous reports, using a healthy and regenerating liver atlas, iEPs generated with Hnf4 $\alpha$ -  
421 Foxa1 alone classify mainly as stromal cells (**Figure 5G**). However, following the addition of Fos  
422 and Yap1, a significant population ( $p < 0.0001$ , randomized test) of injured BECs emerges, in  
423 similar proportions as observed in long-term cultured iEPs (Kong et al., 2022). In addition to  
424 several hybrid cell types that we previously reported, we also observe a significant expansion of  
425 a normal BEC population, from ~4% to ~12-35%, particularly upon the addition of Yap1 to the  
426 reprogramming cocktail ( $p < 0.0001$ , randomized test), where endogenous *Fos* expression is also  
427 upregulated (**Figure S5G**). We observed a similar expansion of the normal BEC population when  
428 long-term iEPs were cultured in a 3D matrigel sandwich culture (Kong et al., 2022). Here, our  
429 results are consistent with these previous observations and point to the molecular regulation  
430 driving changes in cell identity. In summary, CellOracle analysis and *in silico* prediction, combined  
431 with experimental validation, have revealed several new factors and putative regulatory  
432 mechanisms to enhance the efficiency and fidelity of reprogramming.

433

## 434 Discussion

435 Here, our application of CellOracle to the direct reprogramming of MEF to iEPs revealed  
436 many new insights into this lineage conversion paradigm. Using CellTag-based lineage tracing,  
437 we had previously demonstrated the existence of distinct conversion trajectories: one path leading  
438 to successfully reprogrammed cells and a route to a dead-end state, accompanied by fibroblast  
439 gene re-expression (Bidly et al., 2018). From lineage analysis, we found that sister cells follow

440 the same reprogramming trajectories, suggesting that conversion outcome is established shortly  
441 after overexpression of the reprogramming TFs. The network analysis we present in this study,  
442 powered by CellOracle, supports these earlier observations, revealing GRN reconfiguration within  
443 the first few days of reprogramming. Further, the new clonal tracking we present here confirms  
444 this early GRN configuration and that key wiring differences between reprogrammed and dead-  
445 end outcomes can be identified from early stages.

446 From our analysis of early GRN reconfiguration, we find that *Mef2a* and *Klf6* are highly  
447 connected in fibroblasts and that these connections are largely decommissioned in successfully  
448 converting cells. Although better known as a cardiac factor (Filomena and Bang, 2018), *Mef2a*  
449 expression is enriched in the dead-end population, whereas *Klf6* is enriched in early transition  
450 states, followed by its downregulation as reprogramming progresses (Supplemental data; Bidy  
451 et al., 2018). Considering that relatively few iEPs successfully reprogram, a broad hallmark of  
452 many lineage conversion protocols, targeting such TFs that are highly connected in the starting  
453 population may represent one approach to enhance reprogramming efficiency by promoting the  
454 erasure of starting cell identity.

455 In this study, we have focused on the TFs associated with installing new cell identity. From  
456 our clonal analysis of GRN reconfiguration in reprogrammed-destined cells, we find many  
457 previously unreported regulators of iEP reprogramming. Indeed, our previous time-course  
458 analysis did not identify many candidate regulators in the early stages, as the gene expression  
459 differences were relatively subtle. Here, our network-based analysis recovers several novel early  
460 factors, such as *Klf5*, *Cebpb*, *Mybl2*, *Foxk2*, *Fos*, and *Junb*. The recovery of additional factors is  
461 also likely due to the clonal analysis, which further breaks down population heterogeneity to target  
462 those rare cells that successfully reprogram.

463 Indeed, from our GRN network configuration analysis, we identify several factors that may  
464 regulate the reprogramming process. At this point, we would typically prioritize these factors for  
465 further experimental validation, often basing the prioritization on previous literature, gene  
466 expression patterns, or other available data. Here, we leverage the unique feature of CellOracle:  
467 simulation of cell identity transition following candidate TF perturbation (knockout or  
468 overexpression), using cluster-specific GRNs to model subsequent expression changes in  
469 regulated genes. In a series of analyses complementary to the network analyses, we perform a  
470 systematic *in silico* simulation of 180 TF knockouts to test which factors are required for successful  
471 iEP reprogramming. This analysis revealed many putative reprogramming regulators, and from a  
472 shortlist of eight candidates, we experimentally validated a role for six. Future *in silico* studies

473 could be designed to identify factors to block the entry of cells onto the dead-end trajectory or  
474 factors to accelerate cells down the reprogramming trajectory.

475 From the systematic *in silico* knockout simulation and experimental validation, we  
476 identified five new regulators of iEP reprogramming: *Id1*, *Fosb*, *Fos*, *Eno1*, and *Klf4*. *Klf4* is one  
477 of the previously described core pluripotency reprogramming factors (Takahashi and Yamanaka,  
478 2006). The reduction of iEP reprogramming efficiency following its knockdown also suggests that  
479 *Klf4* plays a role in this direct lineage conversion paradigm. Similarly, *Id1* has also been shown to  
480 play a positive role in reprogramming to pluripotency (Hayashi et al., 2016), suggesting parallels  
481 with direct lineage conversion. We also noted the involvement of several AP-1 factors, both from  
482 our network analyses and *in silico* simulations, including *Fos*, *Fosb*, *Fosl2*, and *Junb*. The FOS-  
483 JUN-AP1 complex has been reported to regulate reprogramming to pluripotency (Xing et al.,  
484 2020) and direct reprogramming to cardiomyocytes (Wang et al., 2022); thus, we selected *Fos*  
485 for further investigation.

486 The CellOracle analyses presented here provide new mechanistic insight into the  
487 reprogramming process. Network connectivity scores and cartography analyses support a role  
488 for the AP-1 subunit *Fos* as a putative reprogramming regulator. Indeed, our simulated  
489 perturbations of *Fos* support its role in generating and maintaining iEPs. We confirmed these  
490 simulations experimentally, where the addition of *Fos* to the reprogramming cocktail significantly  
491 increases the yield of iEPs. Conversely, iEP identity is attenuated upon *Fos* knockout. Further  
492 investigation of inferred *Fos* targets implicates a role for *Yap1*, a Hippo signaling effector, in  
493 reprogramming. This observation is supported by our finding that a well-established signature of  
494 active *Yap1* is enriched as reprogramming progresses, which suggested a role for *Yap1*,  
495 potentially effected via its interactions with *Fos*/AP-1. Indeed, the addition of *Fos* or *Yap1* to the  
496 reprogramming cocktail resulted in a significant increase in reprogramming efficiency, where the  
497 addition of both factors yielded a three-fold increase in iEP colony formation.

498 In a parallel study, we have found that iEPs resemble post-injury biliary epithelial cells  
499 (BECs) (Kong et al., 2022). Considering that *Yap1* plays a central role in liver regeneration (Pepe-  
500 Mooney et al., 2019; Yimlamai et al., 2014), these results raise the possibility that iEPs represent  
501 a regenerative cell type, explaining their *Yap1* activity, self-renewal *in vitro*, and capacity to  
502 functionally engraft liver (Sekiya and Suzuki, 2011), and intestine (Guo et al., 2019; Morris et al.,  
503 2014). Indeed, our unsupervised cell type classification of iEPs reprogrammed with the addition  
504 of *Fos* and *Yap* to the *Hnf4 $\alpha$* -*Foxa1* reprogramming cocktail suggests that these factors can  
505 directly expand both the injured and normal BEC population, supporting the notion that iEPs may  
506 resemble a regenerative population. Altogether, these new mechanistic insights have been

507 enabled by CellOracle analysis, placing it as a powerful tool for the dissection of cell identity,  
508 aiding improvements in reprogramming efficiency and fidelity.

509

### 510 **Limitations of the study**

511 Here, we have presented an analysis of network reconfiguration during fibroblast to iEP  
512 reprogramming, revealing several novel regulators of direct conversion that we further investigate  
513 via *in silico* perturbation and experimental validation. As we have demonstrated, these factors can  
514 be used to increase reprogramming efficiency and fidelity. One limitation of CellOracle is that it  
515 cannot be used to make 'out-of-network' predictions and, due to its use of a linear model, is not  
516 suited to simulating the effects of perturbing several factors in parallel. Moreover, the model is not  
517 designed to simulate the effects of non-physiological levels of factor expression. For these  
518 reasons, CellOracle is not designed to discover *de novo* reprogramming cocktails. Instead, it is  
519 best applied to dissecting the mechanisms of existing reprogramming strategies to enhance their  
520 fidelity and efficiency. Finally, based on the GRN model used for *in silico* simulation, only TF  
521 perturbation can be simulated at present. However, as we have demonstrated with Yap1, the  
522 inferred gene targets of TFs can be scrutinized to provide mechanistic insight.

523

### 524 **Code availability**

525 CellOracle code, documentation, and tutorials are available on GitHub  
526 (<https://github.com/morris-lab/CellOracle>).

527

### 528 **Data availability**

529 All source data, including sequencing reads and single-cell expression matrices, are available  
530 from the Gene Expression Omnibus (GEO) under accession codes GSE99915 (Bidy et al., 2018)  
531 and GSE145298 for the new scRNA-seq data presented in this manuscript.

532

### 533 **Acknowledgments**

534 We thank members of the Morris laboratory for critical feedback. This work was funded by the  
535 National Institute of General Medical Sciences R01 GM126112, and Silicon Valley Community  
536 Foundation, Chan Zuckerberg Initiative Grant HCA2-A-1708-02799, both to S.A.M. S.A.M. is  
537 supported by an Allen Distinguished Investigator Award (through the Paul G. Allen Frontiers  
538 Group), a Vallee Scholar Award, a Sloan Research Fellowship, and a New York Stem Cell  
539 Foundation Robertson Investigator Award; K.K. is supported by a Japan Society for the Promotion



540 of Science Postdoctoral Fellowship; C.M.H is supported by a National Science Foundation  
541 Graduate Research Fellowship (DGE-2139839 and DGE-1745038).

542

### 543 **Author Contributions**

544 Conceptualization, Methodology, K.K., S.A.M.; Software, K.K.; Formal Analysis, K.K., M.A.T.,  
545 K.J., C.M.H., S.A.M; Investigation, K.K., M.A.T., K.J., C.M.H., X.Y., S.A.M.; Data Curation, K.K.,  
546 M.A.T., K.J.; Writing – Original Draft, K.K., S.A.M.; Writing – Review & Editing, K.K., M.A.T., K.J.,  
547 C.M.H., S.A.M.; Visualization, K.K., S.A.M.; Funding Acquisition, Resources, Supervision, S.A.M.

548

### 549 **Competing Interests**

550 S.A.M. is a co-founder of CopyBio LLC.

551 **Correspondence and requests for materials** should be addressed to S.A.M.

552

### 553 **Figure Legends**

554 **Figure 1. Application of CellOracle to assess GRN dynamics direct lineage reprogramming.**

555 Overview of the CellOracle pipeline to infer cell type- and state-specific GRN configurations. **(A)**  
556 First, CellOracle uses scATAC-seq data to identify accessible promoter/enhancer DNA  
557 sequences. The DNA sequence of regulatory elements is scanned for TF binding motifs,  
558 generating a list of potential regulatory connections between a TF and its target genes to generate  
559 a ‘Base GRN’ **(B)**. **(C)** Using single-cell expression data, active connections are identified from  
560 all potential connections in the base GRN. **(D)** Cell type- and state-specific GRN configurations  
561 are constructed by pruning insignificant or weak connections. **(E)** Schematic of *Hnf4 $\alpha$*  and *Foxa1*-  
562 mediated fibroblast to iEP reprogramming. Our previous CellTag lineage tracing revealed two  
563 conversion trajectories; reprogramming and dead-end (Bidy et al., 2018). **(F)** Left panel: Force-  
564 directed graph of fibroblast to iEP reprogramming: from Louvain clustering, 15 clusters of cells  
565 were annotated manually, using marker gene expression, and grouped into five cell types;  
566 Fibroblasts, Early\_Transition, Transition, Dead-end, and Reprogrammed iEPs. Right panels:  
567 Projection of *Apoa1* (iEP marker) and *Col1a2* (fibroblast marker) expression onto the force-  
568 directed graph. **(G)** CellOracle analysis: The strength of network edges between *Hnf4 $\alpha$ -Foxa1*  
569 and its target genes, visualized as a heatmap (left panel), and plotted as a boxplot (right panel).  
570 **(H)** Degree and Eigenvector centrality scores for the *Hnf4 $\alpha$ -Foxa1* transgene. **(I)** *Hnf4 $\alpha$ -Foxa1*  
571 network cartography terms for each cluster. **(J, K)** Scatter plots showing a comparison of degree  
572 centrality scores between specific clusters. **(J)** Comparison of degree centrality scores between

573 the Fib\_1 cluster GRN configuration and the GRN configurations of other clusters in relatively  
574 early stages of reprogramming. **(K)** Comparison of degree centrality scores between iEP\_1 and  
575 Dead-end\_0 cluster GRN configurations.

576

577 **Figure 2. Lineage tracing reveals how early network state shapes reprogramming outcome**

578 **(A)** Overview of CellTag-based clonal tracking. The CellTag construct contains a random  
579 'CellTag' barcode in the 3' UTR of GFP, followed by an SV40 polyadenylation signal. Cells are  
580 transduced with the CellTag lentiviral library (produced via transfection of HEK293T cells with the  
581 complex plasmid library) so that each cell expresses ~3–4 CellTags, resulting in a unique,  
582 heritable signature. CellTags are transcribed and captured during single-cell profiling, enabling  
583 clonally related cells to be tracked throughout an experiment. **(B)** Experimental strategy to capture  
584 'state-fate' relationships. MEFs are first transduced with Hnf4 $\alpha$ -Foxa1, delivered via four rounds  
585 of retrovirus in a 48 hr period. The complex CellTag lentivirus library is introduced on the last  
586 round of transduction. The end of this period, with transgene expression at a maximum, is  
587 considered reprogramming day 0. Cells are expanded, and 25% of the population is profiled at  
588 day 4, to maximize the capture of clones in early stages – this is referred to as the 'state'  
589 population. The remaining population is reseeded and profiled again on days 10 and 28 to capture  
590 reprogramming outcome, referred to as 'fate'. **(C)** Cells captured in the state-fate experiment.  
591 Timepoint information is projected onto the UMAP embedding. A total of 24,799 cells were  
592 sequenced: 8,440 on day 4, 4,836 on day 10, and 11,523 on day 28. **(D)** Projection of fibroblast,  
593 iEP, and dead-end identity scores onto the UMAP embedding to reveal reprogrammed and dead-  
594 end cell fates **(E).** **(F)** A randomized test identified day 4 state clones whose day 10 and 28 fate  
595 sisters were iEP enriched or iEP depleted. Top: Kernel density estimation of iEP-enriched day 4  
596 state clones and their day 10 and 28 fates, outlining the 'reprogramming' trajectory (n = 879 cells).  
597 Bottom: Kernel density estimation of iEP-depleted day 4 state clones and their day 10 and 28  
598 fates, outlining the 'dead-end' trajectory (n = 4,955 cells). **(H)** Comparison of degree centrality  
599 scores between native fibroblasts and day 4 reprogrammed-destined cells (left) and day 4  
600 reprogrammed- and dead-end-destined cells (right).

601

602 **Figure 3. Systematic *in silico* simulation of TF knockout to identify novel regulators of iEP**

603 **reprogramming.** **(A)** Monocle-based pseudotemporal ordering of 48,515 cells from the Bidy  
604 2018 reprogramming dataset, 2 independent biological replicates. **(B)** Schematic for perturbation  
605 score calculations. CellOracle calculates a perturbation score by comparing the direction of the  
606 simulated cell state transition with the direction of cell differentiation. First, the pseudotime data

607 is summarized by grid points and converted into a 2D gradient vector field. The results of the  
608 perturbation simulation are converted into the same vector field format, and the inner product of  
609 these vectors is calculated to produce a perturbation score. **(C)** A positive perturbation score  
610 (green suggests the perturbation is predicted to promote differentiation. In contrast, the negative  
611 perturbation score (magenta) represents impaired differentiation. **(D)** Ranked list of TFs based on  
612 the sum of the negative perturbation score. **(E)** Representative example of a TF KO simulation.  
613 **(F)** Experimental validation of candidate TFs: Colony formation assay. **(G)** Colony quantification.  
614  $n = 5$  independent biological replicates for scramble shRNA control, *Fosb*, *Id1*;  $n = 4$  independent  
615 biological replicates for *Eno1*, *Klf4*;  $n = 3$  independent biological replicates for *Fos*; paired t-test,  
616 two-tailed; \* =  $p < 0.05$ ; \*\* =  $p < 0.01$

617

618 **Figure 4. CellOracle analysis and experimental validation of *Fos* in the establishment and**  
619 **maintenance of iEP identity. (A)** Degree centrality, betweenness centrality, and eigenvector  
620 centrality of *Fos* for each cluster. **(B)** Network cartography terms of *Fos* for each cluster. **(C)** *Fos*  
621 expression projected onto the force-directed graph of the 2018 reprogramming time course. **(D)**  
622 Violin plot of *Fos* expression across reprogramming stages. **(E)** *Fos* gene overexpression  
623 simulation with reprogramming GRN configurations. The left panel is the projection of simulated  
624 cell transitions onto the force-directed graph. The Sankey diagram summarizes the simulation of  
625 cell transitions between cell clusters. For overexpression simulation, *Fos* expression was set to a  
626 value of 1.476, representing its maximum value in the imputed gene expression matrix **(F)** *Fos*  
627 gene knockout simulation. **(G)** Colony formation assay with addition of *Fos* to the *Hnf4 $\alpha$ -Foxa1*  
628 reprogramming cocktail. Left panel: E-cadherin immunohistochemistry. Right panel: box plot of  
629 colony numbers ( $n = 6$  technical replicates, 2 independent biological replicates; \*\*\* =  $P < 0.001$ ,  
630 *t*-test, one-sided). **(H)** qPCR assay for *Fos* and iEP marker expression (*Apoa1* and *Chd1*)  
631 following addition of *Fos* to the *Hnf4 $\alpha$ -Foxa1* reprogramming cocktail ( $n = 3$  independent biological  
632 replicates; \*\*\* =  $P < 0.001$ , \*\* =  $P < 0.01$ , *t*-test, one-sided). **(I)** *Fos* gene knockout simulation in  
633 expanded, long-term cultured iEPs. **(J)** CRISPR/Cas9 knockout of *Fos* using CRISPR/Cas9 in  
634 expanded iEP cells. We designed 3 guide RNAs to target *Fos*, and transduced Cas9-expressing  
635 iEP cells with this guide RNA lentivirus pool. Left panels: Kernel density estimation method was  
636 applied with the t-SNE embedding to compare cell density between control guide RNAs and guide  
637 RNAs targeting *Fos*. Right panels: Quantification of changes in cell ratio following *Fos* knockout.  
638

639 **Figure 5. Inferred *Fos* targets reveal a role for the Hippo signaling effector, *Yap1*, in**  
640 **reprogramming. (A)** Heatmap of expression of the top 50 inferred *Fos* targets across all stages

641 of reprogramming. Established targets of YAP1 are highlighted in red. **(B)** Colony formation assay  
642 with the addition of Yap1 and Fos to the Hnf4 $\alpha$ -Foxa1 reprogramming cocktail. Left panels: E-  
643 cadherin immunohistochemistry. Right panel: box plot of colony numbers (n = 6 independent  
644 biological replicates; \*\*\* =  $P < 0.001$ ,  $t$ -test, one-sided). **(C)** Brightfield and epifluorescence images  
645 of cells reprogrammed with Hnf4 $\alpha$ -Foxa1 or Hnf4 $\alpha$ -Foxa1-Fos-Yap1 cocktails. Scale bar = 500  
646  $\mu$ M. **(D)** scRNA-seq analysis of cells reprogrammed with Hnf4 $\alpha$ -Foxa1 (n= 7,414 cells), Hnf4 $\alpha$ -  
647 Foxa1-Fos (n= 8,771 cells), Hnf4 $\alpha$ -Foxa1-Yap1 (n= 8,549 cells), and Hnf4 $\alpha$ -Foxa1-Fos-Yap1 (n=  
648 10,507 cells) cocktails and collected at day 20. Projection of fibroblast and iEP identity scores  
649 onto the UMAP embedding. **(E)** Kernel density estimation of cell density for each reprogramming  
650 cocktail from **(D)**. **(F)** Violin plot of iEP identity scores for each reprogramming cocktail. \*\*\*\* =  
651  $p < 0.0001$ , Wilcoxon test. **(G)** Unsupervised cell type classification for each reprogramming  
652 cocktail, using normal and injured mouse liver as a reference. BEC: Biliary epithelial cells. \* =  $p =$   
653 0, randomized test.

654

## 655 **Materials and Methods**

656 **CellOracle.** CellOracle is an integrative tool for GRN inference and network analysis. It consists  
657 of several steps: (1) base GRN construction using scATAC-seq data, (2) context-dependent GRN  
658 inference using scRNA-seq data, (3) network analysis, and (4) simulation of cell identity after  
659 perturbation. We created the algorithm in Python and designed it for use in the Jupyter notebook  
660 environment. CellOracle code is open source and available on GitHub  
661 (<https://github.com/morris-lab/CellOracle>), along with detailed function descriptions and tutorials.  
662 Further details can be found in the original preprint (Kamimoto et al., 2020).

663

664 **10x alignment, digital gene expression matrix generation.** The Cell Ranger v6.0.1 pipeline  
665 (<https://support.10xgenomics.com/single-cell-gene-expression/software/downloads/latest>) was  
666 used to process data generated using the 10x Chromium platform. Cell Ranger processes, filters,  
667 and aligns reads generated with the Chromium single-cell RNA sequencing platform. This pipeline  
668 was used in conjunction with a custom reference genome, created by concatenating the  
669 sequences corresponding to the *Hnf4 $\alpha$ -t2a-Foxa1* transgene as a new chromosome to the mm10  
670 genome. The unique UTRs in the *Hnf4 $\alpha$ -t2a-Foxa1* transgene construct allowed us to monitor  
671 transgene expression. To create Cell Ranger compatible reference genomes, the references were  
672 rebuilt according to instructions from 10x ([https://support.10xgenomics.com/single-cell-gene-  
673 expression/software/pipelines/latest/advanced/references](https://support.10xgenomics.com/single-cell-gene-expression/software/pipelines/latest/advanced/references)). To achieve this, we first created a  
674 custom gene transfer format (GTF) file, containing our transgenes, followed by indexing of the

675 FASTA and GTF files, using Cell Ranger 'mkgtf' and 'mkref' functions. Following this step, the  
676 default Cell Ranger pipeline was implemented, then the filtered output data was used for  
677 downstream analyses.

678

### 679 **CellTag clone calling**

680 Reads containing the CellTag sequence were extracted from the processed and filtered BAM files  
681 produced by the 10x Genomics pipeline, using our CellTagR pipeline:

682 <https://github.com/morris-lab/CellTagR>. The resulting filtered CellTag UMI count matrix was then  
683 used for all downstream clone and lineage analysis. The CellTag matrix was initially filtered by  
684 removing CellTags that do not appear on the allowlist generated for each CellTag plasmid library  
685 Cells expressing more than 20 CellTags (likely corresponding to cell multiplets) and less than 2  
686 CellTags per cell were filtered out. To identify clonally related cells, Jaccard analysis using the R  
687 package Proxy was used to calculate the similarity of CellTag signatures between cells. Clones  
688 were defined as groups of 2 or more related cells. Clones were called on cells pre-filtered for  
689 numbers of genes, UMIs, and mitochondrial RNA content.

690

### 691 **Cell type classification with Capybara**

692 Cells reprogramed with Hnf4 $\alpha$ -Foxa1, Hnf4 $\alpha$ -Foxa1-Fos, Hnf4 $\alpha$ -Foxa1-Yap1, and Hnf4 $\alpha$ -Foxa1-  
693 Fos-Yap1 were classified using Capybara (Kong et al., 2022). Briefly, the single-cell datasets  
694 were processed, filtered, and clustered using Seurat, resulting in 35,241 cells (7,414 HF, 8,771  
695 HF-Fos, 8,549 HF-Yap, 10,507 HF-Fos-Yap1). To construct a reference for cell-type  
696 classification, we obtained scRNA-seq data of biliary epithelial cells (BECs) and hepatocytes,  
697 before and after injury, from GSE125688 (Pepe-Mooney et al., 2019). We built a custom high-  
698 resolution reference by incorporating additional tissues from the MCA: fetal liver, MEFs, and  
699 embryonic mesenchyme. Following the construction of a high-resolution reference, we performed  
700 preprocessing on the reference and the samples, on which we then applied quadratic  
701 programming to generate the identity score matrices. Further, we categorized cells into discrete,  
702 hybrid, and unknown, calculated the empirical p-value matrices, and performed binarization and  
703 classification. We calculated the percent composition of each cell type. Cells with hybrid identities  
704 were filtered and refined based on their identity scores as well as representation by more than  
705 0.5% cells of the population. Code and documentation are available at:

706 <https://github.com/morris-lab/Capybara>.

707

### 708 **Experimental Methods**

709 **Mice and derivation of mouse embryonic fibroblasts.** Mouse Embryonic Fibroblasts were  
710 derived from E13.5 C57BL/6J embryos. (The Jackson laboratory: 000664). Heads and visceral  
711 organs were removed from E13.5 embryos. The remaining tissue was minced with a razor blade  
712 and then dissociated in a mixture of 0.05% Trypsin and 0.25% Collagenase IV (Life Technologies)  
713 at 37°C for 15 minutes. After passing the cell slurry through a 70µM filter to remove debris, cells  
714 were washed and then plated on 0.1% gelatin-coated plates, in DMEM supplemented with 10%  
715 FBS (Sigma-Aldrich), 2mM L-glutamine, and 50mM β-mercaptoethanol (Life Technologies). All  
716 animal procedures were based on animal care guidelines approved by the Institutional Animal  
717 Care and Use Committee.

718  
719 **Retrovirus Production.** Retroviral particles were produced by transfecting 293T-17 cells (ATCC:  
720 CRL-11268) with the pGCDN-Sam construct containing Hnf4α-t2a-Foxa1/Fos/Yap1, along with  
721 packaging construct pCL-Eco (Imgenex). Virus was harvested 48hr and 72hr after transfection  
722 and applied to cells immediately following filtering through a low-protein binding 0.45µM filter.

723  
724 **Lentiviral constructs and lentivirus production.** Lentiviral particles were produced by  
725 transfecting 293T-17 cells (ATCC: CRL-11268) with the envelope construct pCMV-VSV-G  
726 (Addgene plasmid 8454), the packaging construct pCMV-dR8.2 dvpr (Addgene plasmid 8455),  
727 and the shRNA expression vector for the respective candidate TF to be knocked down. The  
728 shRNA expression vectors (with the TRC2 pLKO.5 backbone) were obtained directly from  
729 Millipore-Sigma or cloned into the empty backbone using oligonucleotides (Integrated DNA  
730 Technologies). Sequences of shRNA used: SHC202 (non-target shRNA control)  
731 CAACAAGATGAAGAGCACCAA; *Eno1* GGCACAGAGAATAAATCTAAA; *Fos*  
732 ATCCGAAGGGAACGGAATAAG; *FosB* ATGACGGAAGGACCTCCTTTG; *Foxd2*  
733 AGATCATGTCCTCCGAGAGCT *Id1* GAGCTGAACTCGGAGTCTGAA; *Klf2*  
734 GACCGATTGTATTTCTATAAG *Klf4* CATGTTCTAACAGCCTAAATG; *Klf15*  
735 CTACCCTGGAGGAGATTGAAG. Virus was harvested 48hr and 72hr after transfection and  
736 applied to cells following filtering through a low-protein binding 0.45µm filter.

737 For generation of the complex CellTag library, lentiviral particles were produced by  
738 transfecting 293T-17 cells (ATCC: CRL-11268) with the pSMAL-CellTag construct, along with  
739 packaging constructs pCMV-dR8.2 dvpr (Addgene plasmid 8455), and pCMV-VSVG (Addgene  
740 plasmid 8454).

741

742 **Generation and collection of iEPs.** Mouse embryonic fibroblasts (< passage 6) were converted  
743 to iEPs as in (Biddy et al., 2018), modified from (Sekiya and Suzuki, 2011). Briefly, we transduced  
744 cells every 12hr for 3 days, with fresh Hnf4 $\alpha$ -t2a-Foxa1 retrovirus, in the presence of 4mg/ml  
745 Protamine Sulfate (Sigma-Aldrich), followed by culture on 0.1% gelatin-treated plates for 1 week  
746 in hepato-medium (DMEM:F-12, supplemented with 10% FBS, 1 mg/ml insulin (Sigma-Aldrich),  
747 dexamethasone (Sigma-Aldrich), 10mM nicotinamide (Sigma-Aldrich), 2mM L-glutamine, 50mM  
748  $\beta$ -mercaptoethanol (Life Technologies), and penicillin/streptomycin, containing 20 ng/ml  
749 hepatocyte growth factor (Sigma-Aldrich), and 20 ng/ml epidermal growth factor (Sigma-Aldrich).  
750 After the seven days of culture, the cells were transferred onto plates coated with 5 $\mu$ g/cm<sup>2</sup> Type  
751 I rat collagen (Gibco, A1048301). For single-cell processing, 30,000 reprogrammed, expanded  
752 iEPs were collected and fixed in methanol, as previously described in (Alles et al., 2017). Briefly,  
753 cells were collected and washed in Phosphate Buffered Saline (PBS), followed by resuspension  
754 in ice-cold 80% Methanol in PBS, with gentle vortexing. These cells were stored at -80°C for up  
755 to three months, and processed on the 10x platform (below).

756 For the state-fate experiments, we followed the above protocol with some slight  
757 modifications. We transduced cells every 12hr for 2 days, with fresh Hnf4 $\alpha$ -t2a-Foxa1 retrovirus,  
758 and added CellTagging lentivirus on the final round of transduction. After 12hr, cells were washed  
759 and expanded in hepato-medium for 4 days, at which point the cells were dissociated and 25%  
760 of the population profiled by scRNA-seq. The remaining population was replated and additional  
761 samples were profiled at days 10 and 28.

762  
763 **Colony formation assays.** Mouse *Fos* and *Yap1* were cloned from iEPs into the retroviral vector,  
764 pGCDNSam (Sekiya and Suzuki, 2011), and retrovirus produced as above. For comparative  
765 reprogramming experiments, mouse embryonic fibroblasts (2x10<sup>5</sup>/well of a 6-well plate) were  
766 serially transduced over 72hr (as above). In control experiments, virus produced from an empty  
767 vector control expressing only GFP was added to the Hnf4 $\alpha$ -Foxa1 reprogramming cocktail. Virus  
768 produced from the *Fos* and *Yap1* IRES-GFP constructs was added to the standard Hnf4 $\alpha$  and  
769 Foxa1 cocktail. Cells underwent reprogramming for two weeks and were processed for colony  
770 formation assays: cells were fixed on the plate with 4% PFA, permeabilized in 0.1% Triton-X100  
771 then blocked with Mouse on Mouse Elite Peroxidase Kit (Vector PK-2200). Primary antibody,  
772 mouse anti-E-Cadherin (1:100, BD Biosciences) was applied for 30 min before washing and  
773 processing with the VECTOR VIP Peroxidase Substrate Kit (Vector SK-4600). Colonies were  
774 visualized on a flatbed scanner, adding heavy cream to each well in order to increase image  
775 contrast. Colonies were counted, using our automated colony counting tool:

776 <https://github.com/morris-lab/Colony-counter>. *Fos* and *Yap1* overexpression was confirmed by  
777 harvesting RNA from Hnf4 $\alpha$  -Foxa1 and Hnf4 $\alpha$  -Foxa1-Fos/Yap1-transduced cells (RNeasy kit,  
778 Qiagen). Following cDNA synthesis (Maxima cDNA synthesis kit, Life Tech), qPCR was  
779 performed to quantify *Fos/Yap1* overexpression (TaqMan Probes: Gapdh Mm99999915\_g1;  
780 *Cdh1* Mm01247357\_m1; *Apoa1* Mm00437569\_m1; *Fos* Mm00487425\_m1; *Yap1*  
781 Mm01143263\_m1; TaqMan qPCR Mastermix, Applied Biosystems).

782  
783 Colony formation assays for TF knockdowns were conducted similarly, with the following  
784 modifications. To initiate reprogramming, mouse embryonic fibroblasts ( $75 \times 10^3$ /well of a 6-well  
785 plate) were serially transduced over 72hr (as above). Lentivirus produced from the non-target  
786 shRNA control and the respective TF knockdown shRNA constructs was then added at 84hr and  
787 96 hr (only added at 96hr for initial screen). At 120hr, cells were seeded for colony formation  
788 assays ( $40 \times 10^3$  cells/well of a 6-well plate), which were then processed for colony formation on  
789 day 14 as above. Remaining cells from each sample were seeded for harvesting RNA for qPCR  
790 on day 14 as above. In the initial screen, cells from each sample were split equally, and seeded  
791 in 6 well plates for colony formation and RNA extraction at D15 from reprogramming initiation.  
792 For *Fos* and *FosB* knockdowns, mouse embryonic fibroblasts ( $120 \times 10^3$  in a 6-cm dish) were  
793 transduced with the respective shRNA lentivirus at 24hr and 36hr post-seeding. qPCR  
794 confirmation was done on RNA harvested from cells at 72hr post-seeding. TaqMan Probes used:  
795 *Actb* Mm02619580\_g1; *Eno1* Mm01619597\_g1; *Fos* Mm00487425\_m1; *Fosb* Mm00500401\_m1;  
796 *Foxd2* Mm00500529\_s1; *Id1* Mm00775963\_g1; *Klf2* Mm00500486\_g1; *Klf4* Mm00516104\_m1;  
797 *Klf15* Mm00517792\_m1.

798

### 799 **CRISPR/Cas9 *Fos* Knockout**

800 The *Fos* knockouts were performed as part of a larger screen, using Perturb-seq as previously  
801 described (Adamson et al., 2016). The protocol was modified, as outlined below, to apply the  
802 strategy to our experimental system:

803

804 (1) *Vector backbone and gene barcode pool construction*: For Perturb-seq experiments, we used  
805 a lentivirus vector to express guide RNAs and gene barcodes (GBC). The lentivirus vector  
806 backbone contains an antiparallel cassette containing a guide RNA and GBC. In the original  
807 perturb-seq paper, the authors used pPS and pBA439 to construct the guide RNA-GBC vector  
808 pool. Here, we modified pPS and pBA439 to generate the pPS2 vector, in which the Puromycin-  
809 t2a-BFP gene was replaced by the Blasticidin-t2a-BFP gene. We constructed the guide RNA-



810 GBC vector using a multi-step cloning strategy: First, we synthesized dsDNA, via PCR, for a  
811 random GBC pool. We purified the PCR product with AMPure XP SPRI beads. We then inserted  
812 the purified GBC pool into the pPS2 vector at the EcoRI site in the 3' UTR of the Blastidn-t2a-  
813 BFP gene. We used the product of Gibson assembly for transformation into DH5 $\alpha$  competent  
814 cells (NEB: C2987H). Transformed cells were cultured directly in LB liquid. We extracted plasmid  
815 DNA to yield the pPS2-GBC pool.

816

817 (2) *Guide RNA cloning*. We designed guide RNAs using <https://zlab.bio/guide-design-resources>.  
818 We synthesized oligo DNA for each guide RNA. Oligo DNA pairs were annealed and inserted into  
819 the pPS2-GBC vector, following BsmB1 digestion. After isolation and growth of single colonies,  
820 plasmid DNA was extracted and sanger DNA sequenced; sequences of the guide RNA inserted  
821 site and GBC site were used to construct a gRNA/GBC reference table:

822

|     |         |                        |
|-----|---------|------------------------|
| 823 | Fos_sg0 | CAGCCGACTGAACGCGTTATTC |
| 824 | Fos_sg1 | CATATATCAAAGATGAACATTG |
| 825 | Fos_sg2 | TCAAGGCTGTAATTTCTTGGGC |
| 826 | empty0  | TTGATGAACTGCGCTAGCGAGG |
| 827 | empty1  | AAGAGCGGCTCGCAAGGGAAAA |
| 828 | empty2  | AGTAGGATACGTGGAGTTAATA |

829

830 (3) *Lentivirus guide RNA pool generation*. An equal amount of DNA for each pPS2-guide RNA  
831 vector was mixed together to generate the plasmid pool. Three control vectors were also mixed  
832 with this plasmid vector pool; the weight ratio of each pPS2-guide vector to each control vector  
833 was 1:4. We used this mixed DNA pool for lentivirus production. Lentiviral particles were produced  
834 by transfecting 293T-17 cells (ATT: CRL-11268) with the pPS-guide RNA-GBC constructs, along  
835 with the packaging plasmid, psPAX2 (<https://www.addgene.org/12260/>), and pMD2.G  
836 (<https://www.addgene.org/12259/>).

837

838 (4) *Cell culture for Perturb-seq*. We transduced reprogrammed iEP cells with retrovirus carrying  
839 Cas9 (MSCV-Cas9-Puro). The cells were treated with Puromycin (4  $\mu$ g/ml) for four days to  
840 eliminate non-transduced cells. iEP-Cas9 cells were transduced with the lentivirus guide RNA  
841 pool for 24 hours. The concentration of lentivirus was pre-determined to target 10~20%  
842 transduction efficiency. After four days of cell culturing, we sorted BFP positive cells to purify

843 transduced cells. Cells were cultured for a further 72 hours and fixed with methanol as previously  
844 described (Alles et al., 2017).

845  
846 (5) *GBC amplification and sequencing*. Following library preparation on the 10x chromium  
847 platform (below), we PCR amplified the GBC. The amplification was performed largely according  
848 the original perturb-seq paper (Adamson et al., 2016), but we modified the PCR primer sequence  
849 for the Chromium single cell library v2 kit:

850  
851 P7\_ind\_R2\_BFP\_primer:  
852 CAAGCAGAAGACGGCATAACGAGATTCGCCTTAGTGACTGGAGTTCAGACGTGTGCTCTTC  
853 CGATCTTAGCAAACCTGGGGCACAAGC

854 P5\_partial\_primer: AATGATACGGCGACCACCGA  
855 GBG\_Amp\_F: GCTGATCAGCGGGTTTAAACGGGCCCTCTAGG  
856 GBG\_Amp\_R: CGCGTCGTGACTGGGAAAACCCTGGCGAATTG

857 GBC\_Oligo:  
858 TTAAACGGGCCCTCTAGGNNNNNNNNNNNNNNNNNNNNNNNNNNNNNNCAATTCGCCAGGGTTTTCC

859 Following amplification, we purified the PCR product with AMPure XP SPRI beads. The  
860 purified sample was sequenced on the Illumina Mi-seq platform.

861  
862 (6) *Alignment of cell barcode/GBC*. For preprocessing of Perturb-seq metadata, we used  
863 MIMOSCA, a computational pipeline for the analysis of perturb-seq data  
864 (<https://github.com/asncd/MIMOSCA>). First, the reference table for the cell barcode/GBC pair was  
865 generated from Fastq files. The data table was converted into the guide RNA/cell barcode table  
866 using the guide RNA-GBC reference table. This metadata was integrated into the scRNA-seq  
867 data. The guide metadata was processed with an EM-like algorithm in MIMOSCA to filter out  
868 unperturbed cells computationally, as previously described (Adamson et al., 2016).

869  
870 **10x procedure**. For single-cell library preparation on the 10x Genomics platform, we used: the  
871 Chromium Single Cell 3' Library & Gel Bead Kit v2 (PN-120237), Chromium Single Cell 3' Chip  
872 kit v2 (PN-120236), and Chromium i7 Multiplex Kit (PN-120262), according to the manufacturer's  
873 instructions in the Chromium Single Cell 3' Reagents Kits V2 User Guide. Prior to cell capture,  
874 methanol-fixed cells were placed on ice, then spun at 3000rpm for 5 minutes at 4°C, followed by  
875 resuspension and rehydration in PBS, according to (Alles et al., 2017). 17,000 cells were loaded

876 per lane of the chip, aiming to capture 10,000 single-cell transcriptomes. The resulting cDNA  
877 libraries were quantified on an Agilent TapeStation and sequenced on an Illumina HiSeq 2500.

878

## 879 **Supplemental Figure Legends**

880 **Supplemental Figure 1 (Related to Figure 1). GRN analysis of fibroblast to iEP**  
881 **reprogramming. (A)** After base GRN construction (left panel) using single-cell expression data,  
882 an active connection between the TF and the target gene is identified for defined cell identities  
883 and states by building a machine learning (ML) model that predicts the relationship between the  
884 TF and the target gene. ML model fitting results present the certainty of connection as a  
885 distribution, enabling the identification of GRN configurations by removing inactive connections  
886 from the base GRN structure. **(B)** Force-directed graph of iEP reprogramming scRNA-seq data  
887 ( $n = 27,663$  cells). Projection of: Reprogramming time point information onto the force-directed  
888 graph. There are 8 time points; day 0, 3, 6, 9, 12, 15, 21, and 28; *Hnf4 $\alpha$ -t2a-Foxa1* (*Hnf4 $\alpha$ -Foxa1*)  
889 transgene expression levels; marker gene expression for key iEP states. Reprogrammed iEP cell  
890 cluster marker genes: *Cdh1*, *Apoa1*, and *Kng1*. Fibroblast marker gene: *Col1a2*. Transition  
891 marker gene: *Mettl7a1*. Dead-end marker genes: *Peg3*, *Igf2*, and *Fzd1*. **(C)** Violin plots of marker  
892 gene expression in each cluster. **(D)** PAGA connectivity analysis across the reprogramming time  
893 course. **(E)** Illustration of the cartography analysis method. The cartography method classifies  
894 genes into seven groups according to two network scores: within-module degree and participation  
895 coefficient (Guimerà and Amaral, 2005). In complex networks, high degree nodes (hubs) play the  
896 most significant roles in maintaining network structure. **(F)** Pie charts depicting the clonal  
897 composition of Dead-end cluster 0 and Dead-end cluster 1. Clone and trajectory information is  
898 derived from our previous CellTagging study (Bidy et al., 2018).

899

900 **Supplemental Figure 2 (Related to Figure 2). CellOracle network analysis of cells destined**  
901 **to reprogrammed or dead-end states. (A)** Projection of Leiden cluster and gene expression  
902 information onto the state-fate UMAP embedding (from **Figure 2C-F**) to identify reprogrammed  
903 and dead-end fates. **(B)** Violin plots of reprogrammed (*Apoa1*, *Cdh1*), fibroblast (*Col1a1*, *Col1a2*),  
904 and dead-end (*Peg3*) marker expression along the iEP-enriched and iEP-depleted trajectories.  
905 **(C)** To assess the quality of the inferred networks, we calculated the degree distribution for each  
906 GRN configuration after pruning weak network edges, based on the p-value and strength. We  
907 counted the network degree ( $k$ ), representing the number of network edges for each gene.  $P(k)$   
908 is the frequency of network degree  $k$ , visualized in scatter plots. We also visualized the

909 relationship between  $k$  and  $P(k)$  after log-transformation shows that these are scale-free networks,  
910 demonstrating successful network inference from these relatively small cell populations.

911

912 **Supplemental Figure 3 (Related to Figure 3). Systematic *in silico* simulation of TF**

913 **knockout. (A)** Overview of signal propagation simulation. CellOracle leverages an inferred GRN  
914 model to simulate how target gene expression changes in response to the changes in regulatory  
915 gene expression. The input TF perturbation (shown in yellow) is propagated side-by-side within  
916 the network model. **(B)** Leveraging the linear predictive ML algorithm features, CellOracle uses  
917 the GRN model as a function to perform the signal propagation calculation. Iterative matrix  
918 multiplication steps enable the estimation of indirect and global downstream effects resulting from  
919 the perturbation of a single TF. **(C)** After signal propagation, the simulated gene expression shift-  
920 vector is converted into a 2D vector and projected onto the dimensional reduction space. Details  
921 are described in the methods section. **(D)** Left: Monocle states identified and used for GRN  
922 inference. Right: Calculated pseudotime projected on the Monocle embedding and converted to  
923 a 2D gradient vector field. **(E)** Schematic of the method to convert pseudotime to a 2D gradient  
924 vector field: First, the pseudotime data is summarized by grid points, then CellOracle calculates  
925 a 2D gradient vector of the pseudotime data that represents the directionality of reprogramming  
926 pseudotime. **(F)** Outline of reprogramming and dead-end trajectories projected onto the Monocle  
927 embedding. The sum of the negative perturbation score was calculated only for reprogramming  
928 trajectory clusters in this study. **(G)** Quantitative RT-PCR to validate knockdown efficiency for  
929 each shRNA. \* =  $p < 0.05$ , \*\* =  $p < 0.01$ , \*\*\* =  $p < 0.001$ , \*\*\*\* =  $p < 0.0001$ ; unpaired t-test with Welch's  
930 correction, two-tailed. **(H)** Colony formation assay (E-cadherin immunohistochemistry) to test iEP  
931 reprogramming efficiency following the knockdown of each candidate factor. **(I)** Quantification of  
932 colonies formed in the initial screen. Factors marked red and \* were selected for further  
933 experimental validation.

934

935 **Supplemental Figure 4 (Related to Figure 4). CellOracle analysis of the role of Fos in**

936 **fibroblast to iEP reprogramming. (A)** Comparison of eigenvector centrality scores between the  
937 Fib\_1 cluster GRN configuration and the GRN configurations of other clusters in relatively early  
938 stages of reprogramming. **(B)** Comparison of eigenvector centrality scores between iEP\_1 and  
939 Dead-end\_0 cluster GRN configurations. **(C-E)** Expression and network cartography of Jun family  
940 members, *Jun*, *Junb*, and *Jund*. **(F)** qPCR of *Fos* expression in fibroblasts and iEPs, with and  
941 without cell dissociation prior to the assay, \*\* =  $P < 0.01$ , *t*-test, one-sided. **(G)** Analysis of *Fos*  
942 mRNA splicing state in the scRNA-seq data of iEP reprogramming to investigate the *Fos* mRNA

943 maturation state: Violin plot for spliced *Fos* mRNA counts. **(H)** *t*-SNE plots of 9,914 expanded  
944 iEPs, cultured long-term, revealing fibroblast-like, intermediate, and three iEP subpopulations.  
945 Expression levels of *Apoa1* (marking typical iEPs), *Col4a1* (fibroblast-like cells), *Cdh1*, *Serpina1b*  
946 (hepatic-like iEPs), and *Areg* (intestine-like iEPs) projected onto the *t*-SNE plot.

947

948 **Supplemental Figure 5 (Related to Figure 5). The role of Fos and Yap1 in fibroblast to iEP**  
949 **reprogramming. (A)** Top 50 decreased genes in *Fos* knockout simulation in the early  
950 reprogramming transition (left) and GO analysis based on these genes (right). **(B)** Violin plot of  
951 YAP1 target gene scores across reprogramming, which are significantly enriched as  
952 reprogramming progresses (\*\*\*) =  $P < 0.001$ , permutation test, one-sided). **(C)** Projection of YAP1  
953 target gene scores onto the force-directed graph of reprogramming. **(D)** qPCR assay for *Yap1*  
954 expression following addition of Yap1 and Fos to the Hnf4 $\alpha$ -Foxa1 reprogramming cocktail (n =  
955 4 independent biological replicates; \*\*\* =  $P < 0.001$ , \*\* =  $P < 0.01$ , *t*-test, one-sided), confirming  
956 Yap1 overexpression. **(E)** qPCR assay for iEP marker expression (*Apoa1* and *Chd1*) following  
957 addition of Yap1 and Fos to the Hnf4 $\alpha$ -Foxa1 reprogramming cocktail (n = 4 independent  
958 biological replicates; \*\*\* =  $P < 0.001$ , \*\* =  $P < 0.01$ , *t*-test, one-sided). **(F)** Projection of Leiden  
959 cluster, dead-end identity scores, and gene expression information onto the state-fate UMAP  
960 embedding (from **Figure 5D, E**). **(G)** Expression of key marker genes for each reprogramming  
961 cocktail.

962

963 **Supplemental Table 1.** Differentially expressed iEP markers from (Bidy et al., 2018). Top-  
964 ranked genes from CellOracle *in silico* perturbation are marked in red.

965

966 **Supplemental Table 2.** Top 50 CellOracle-inferred *Fos* targets, across all reprogramming  
967 clusters. Confirmed YAP1 targets are highlighted in red.

## 968 **References**

969 Adamson, B., Norman, T.M., Jost, M., Cho, M.Y., Nuñez, J.K., Chen, Y., Villalta, J.E., Gilbert,  
970 L.A., Horlbeck, M.A., Hein, M.Y., et al. (2016). A Multiplexed Single-Cell CRISPR Screening  
971 Platform Enables Systematic Dissection of the Unfolded Protein Response. *Cell* 167, 1867-  
972 1882.e21. <https://doi.org/10.1016/j.cell.2016.11.048>.

973 Alles, J., Karaiskos, N., Praktijnjo, S.D., Grosswendt, S., Wahle, P., Ruffault, P.-L., Ayoub, S.,  
974 Schreyer, L., Boltengagen, A., Birchmeier, C., et al. (2017). Cell fixation and preservation for  
975 droplet-based single-cell transcriptomics. *BMC Biology* 15, 44. [https://doi.org/10.1186/s12915-](https://doi.org/10.1186/s12915-017-0383-5)  
976 017-0383-5.

- 977 Bidy, B.A., Kong, W., Kamimoto, K., Guo, C., Waye, S.E., Sun, T., and Morris, S.A. (2018).  
978 Single-cell mapping of lineage and identity in direct reprogramming. *Nature* *564*, 219–224.  
979 <https://doi.org/10.1038/s41586-018-0744-4>.
- 980 Bocchi, V.D., Conforti, P., Vezzoli, E., Besusso, D., Cappadona, C., Lischetti, T., Galimberti, M.,  
981 Ranzani, V., Bonnal, R.J.P., Simone, M. de, et al. (2021). The coding and long noncoding single-  
982 cell atlas of the developing human fetal striatum. *Science* (1979) *372*.  
983 <https://doi.org/10.1126/science.abf5759>.
- 984 van den Brink, S.C., Sage, F., Vértesy, Á., Spanjaard, B., Peterson-Maduro, J., Baron, C.S.,  
985 Robin, C., and van Oudenaarden, A. (2017). Single-cell sequencing reveals dissociation-induced  
986 gene expression in tissue subpopulations. *Nat Methods* *14*, 935–936.  
987 <https://doi.org/10.1038/nmeth.4437>.
- 988 Camacho, D.M., Collins, K.M., Powers, R.K., Costello, J.C., and Collins, J.J. (2018). Next-  
989 Generation Machine Learning for Biological Networks. *Cell* *173*, 1581–1592.  
990 <https://doi.org/10.1016/J.CELL.2018.05.015>.
- 991 Chopp, L.B., Gopalan, V., Ciucci, T., Ruchinskas, A., Rae, Z., Lagarde, M., Gao, Y., Li, C.,  
992 Bosticardo, M., Pala, F., et al. (2020). An Integrated Epigenomic and Transcriptomic Map of  
993 Mouse and Human  $\alpha\beta$  T Cell Development. *Immunity* *53*, 1182-1201.e8.  
994 [https://doi.org/10.1016/J.IMMUNI.2020.10.024/ATTACHMENT/EAD3FF5E-B3B9-46C4-95E3-  
995 E303CC056184/MMC8.XLSX](https://doi.org/10.1016/J.IMMUNI.2020.10.024/ATTACHMENT/EAD3FF5E-B3B9-46C4-95E3-E303CC056184/MMC8.XLSX).
- 996 Cohen, D.E., and Melton, D. (2011). Turning straw into gold: directing cell fate for regenerative  
997 medicine. *Nat Rev Genet* *12*, 243–252. <https://doi.org/10.1038/nrg2938>.
- 998 Davidson, E.H., and Erwin, D.H. (2006). Gene regulatory networks and the evolution of animal  
999 body plans. *Science* *311*, 796–800. <https://doi.org/10.1126/science.1113832>.
- 1000 Dong, J., Feldmann, G., Huang, J., Wu, S., Zhang, N., Comerford, S.A., Gayyed, M.F., Anders,  
1001 R.A., Maitra, A., and Pan, D. (2007). Elucidation of a Universal Size-Control Mechanism in  
1002 *Drosophila* and Mammals. *Cell* *130*, 1120–1133. <https://doi.org/10.1016/J.CELL.2007.07.019>.
- 1003 Eferl, R., and Wagner, E.F. (2003). AP-1: a double-edged sword in tumorigenesis. *Nature*  
1004 *Reviews Cancer* *3*, 859–868. <https://doi.org/10.1038/nrc1209>.
- 1005 Filomena, M.C., and Bang, M.L. (2018). In the heart of the MEF2 transcription network: novel  
1006 downstream effectors as potential targets for the treatment of cardiovascular disease.  
1007 *Cardiovascular Research* *114*, 1425–1427. <https://doi.org/10.1093/CVR/CVY123>.
- 1008 Galli, G.G., Carrara, M., Yuan, W.-C., Valdes-Quezada, C., Gurung, B., Pepe-Mooney, B., Zhang,  
1009 T., Geeven, G., Gray, N.S., de Laat, W., et al. (2015). YAP Drives Growth by Controlling

1010 Transcriptional Pause Release from Dynamic Enhancers. *Molecular Cell* 60, 328–337.  
1011 <https://doi.org/10.1016/J.MOLCEL.2015.09.001>.

1012 Guimerà, R., and Amaral, L.A.N. (2005). Cartography of complex networks: modules and  
1013 universal roles. *Journal of Statistical Mechanics: Theory and Experiment* 2005, P02001.  
1014 <https://doi.org/10.1088/1742-5468/2005/02/P02001>.

1015 Guo, C., Kong, W., Kamimoto, K., Rivera-Gonzalez, G.C., Yang, X., Kirita, Y., and Morris, S.A.  
1016 (2019). CellTag Indexing: genetic barcode-based sample multiplexing for single-cell genomics.  
1017 *Genome Biology* 20, 90. <https://doi.org/10.1186/s13059-019-1699-y>.

1018 Gurdon, J.B., Elsdale, T.R., and Fischberg, M. (1958). Sexually mature individuals of *Xenopus*  
1019 *laevis* from the transplantation of single somatic nuclei. *Nature* 182, 64–65. .

1020 Hayashi, Y., Hsiao, E.C., Sami, S., Lancero, M., Schlieve, C.R., Nguyen, T., Yano, K., Nagahashi,  
1021 A., Ikeya, M., Matsumoto, Y., et al. (2016). BMP-SMAD-ID promotes reprogramming to  
1022 pluripotency by inhibiting p16/INK4A-dependent senescence. *Proc Natl Acad Sci U S A* 113,  
1023 13057–13062.  
1024 [https://doi.org/10.1073/PNAS.1603668113/SUPPL\\_FILE/PNAS.201603668SI.PDF](https://doi.org/10.1073/PNAS.1603668113/SUPPL_FILE/PNAS.201603668SI.PDF).

1025 Heinz, S., Benner, C., Spann, N., Bertolino, E., Lin, Y.C., Laslo, P., Cheng, J.X., Murre, C., Singh,  
1026 H., and Glass, C.K. (2010). Simple combinations of lineage-determining transcription factors  
1027 prime cis-regulatory elements required for macrophage and B cell identities. *Mol Cell* 38, 576–  
1028 589. <https://doi.org/10.1016/j.molcel.2010.05.004>.

1029 Jochum, W., Passequé, E., and Wagner, E.F. (2001). AP-1 in mouse development and  
1030 tumorigenesis. *Oncogene* 20, 2401–2412. <https://doi.org/10.1038/sj.onc.1204389>.

1031 Kamimoto, K., Hoffmann, C.M., and Morris, S.A. (2020). CellOracle: Dissecting cell identity via  
1032 network inference and in silico gene perturbation. *BioRxiv* 2020.02.17.947416.  
1033 <https://doi.org/10.1101/2020.02.17.947416>.

1034 Klein, C., Marino, A., Sagot, M.-F., Vieira Milreu, P., and Brilli, M. (2012). Structural and dynamical  
1035 analysis of biological networks. *Briefings in Functional Genomics* 11, 420–433.  
1036 <https://doi.org/10.1093/bfgp/els030>.

1037 Knaupp, A.S., Buckberry, S., Pflueger, J., Lim, S.M., Ford, E., Larcombe, M.R., Rossello, F.J., de  
1038 Mendoza, A., Alaei, S., Firas, J., et al. (2017). Transient and Permanent Reconfiguration of  
1039 Chromatin and Transcription Factor Occupancy Drive Reprogramming. *Cell Stem Cell* 21, 834–  
1040 845.e6. <https://doi.org/10.1016/J.STEM.2017.11.007>.

1041 Kong, W., Bidy, B.A., Kamimoto, K., Amrute, J.M., Butka, E.G., and Morris, S.A. (2020).  
1042 CellTagging: combinatorial indexing to simultaneously map lineage and identity at single-cell  
1043 resolution. *Nature Protocols* 1–23. <https://doi.org/10.1038/s41596-019-0247-2>.

1044 Kong, W., Fu, Y.C., Holloway, E.M., Garipler, G., Yang, X., Mazzone, E.O., and Morris, S.A.  
1045 (2022). Copybara: A computational tool to measure cell identity and fate transitions. *Cell Stem*  
1046 *Cell* 29, 635-649.e11. <https://doi.org/10.1016/J.STEM.2022.03.001>.

1047 Koo, J.H., Plouffe, S.W., Meng, Z., Lee, D.-H., Yang, D., Lim, D.-S., Wang, C.-Y., and Guan, K.-  
1048 L. (2020). Induction of AP-1 by YAP/TAZ contributes to cell proliferation and organ growth. *Genes*  
1049 *& Development* 34, 72–86. <https://doi.org/10.1101/gad.331546.119>.

1050 Liu, Z., Chen, O., Wall, J.B.J., Zheng, M., Zhou, Y., Wang, L., Ruth Vaseghi, H., Qian, L., and Liu,  
1051 J. (2017). Systematic comparison of 2A peptides for cloning multi-genes in a polycistronic vector.  
1052 *Sci Rep* 7, 2193. <https://doi.org/10.1038/s41598-017-02460-2>.

1053 Madrigal, P., and Alasoo, K. (2018). AP-1 Takes Centre Stage in Enhancer Chromatin Dynamics.  
1054 *Trends Cell Biol* 28, 509–511. <https://doi.org/10.1016/j.tcb.2018.04.009>.

1055 Magaletta, M.E., Lobo, M., Kernfeld, E.M., Aliee, H., Huey, J.D., Parsons, T.J., Theis, F.J., and  
1056 Maehr, R. (2022). Integration of single-cell transcriptomes and chromatin landscapes reveals  
1057 regulatory programs driving pharyngeal organ development. *Nature Communications* 2022 13:1  
1058 13, 1–16. <https://doi.org/10.1038/s41467-022-28067-4>.

1059 la Manno, G., Soldatov, R., Zeisel, A., Braun, E., Hochgerner, H., Petukhov, V., Lidschreiber, K.,  
1060 Kastrioti, M.E., Lönnerberg, P., Furlan, A., et al. (2018). RNA velocity of single cells. *Nature* 560,  
1061 494–498. <https://doi.org/10.1038/s41586-018-0414-6>.

1062 Materna, S.C., and Davidson, E.H. (2007). Logic of gene regulatory networks. *Current Opinion in*  
1063 *Biotechnology* 18, 351–354. <https://doi.org/10.1016/J.COPBIO.2007.07.008>.

1064 Morris, S.A., and Daley, G.Q. (2013). A blueprint for engineering cell fate: current technologies to  
1065 reprogram cell identity. *Cell Res* 23, 33–48. <https://doi.org/10.1038/cr.2013.1>.

1066 Morris, S.A., Cahan, P., Li, H., Zhao, A.M., San Roman, A.K., Shivdasani, R.A., Collins, J.J., and  
1067 Daley, G.Q. (2014). Dissecting Engineered Cell Types and Enhancing Cell Fate Conversion via  
1068 CellNet. *Cell* 158, 889–902. <https://doi.org/10.1016/j.cell.2014.07.021>.

1069 Nie, J., Carpenter, A.C., Chopp, L.B., Chen, T., Balmaceno-Criss, M., Ciucci, T., Xiao, Q., Kelly,  
1070 M.C., McGavern, D.B., Belkaid, Y., et al. (2022). The transcription factor LRF promotes integrin  
1071  $\beta 7$  expression by and gut homing of CD8 $\alpha\alpha^+$  intraepithelial lymphocyte precursors. *Nature*  
1072 *Immunology* 2022 23:4 23, 594–604. <https://doi.org/10.1038/s41590-022-01161-x>.

1073 Pepe-Mooney, B.J., Dill, M.T., Alemany, A., Ordovas-Montanes, J., Matsushita, Y., Rao, A., Sen,  
1074 A., Miyazaki, M., Anakk, S., Dawson, P.A., et al. (2019). Single-Cell Analysis of the Liver  
1075 Epithelium Reveals Dynamic Heterogeneity and an Essential Role for YAP in Homeostasis and  
1076 Regeneration. *Cell Stem Cell* 25, 23-38.e8. <https://doi.org/10.1016/J.STEM.2019.04.004>.



1077 Pliner, H.A., Packer, J.S., McFaline-Figueroa, J.L., Cusanovich, D.A., Daza, R.M., Aghamirzaie,  
1078 D., Srivatsan, S., Qiu, X., Jackson, D., Minkina, A., et al. (2018). Cicero Predicts cis-Regulatory  
1079 DNA Interactions from Single-Cell Chromatin Accessibility Data. *Mol Cell* 71, 858-871.e8.  
1080 <https://doi.org/10.1016/j.molcel.2018.06.044>.

1081 Ramos, A., and Camargo, F.D. (2012). The Hippo signaling pathway and stem cell biology.  
1082 *Trends in Cell Biology* 22, 339–346. <https://doi.org/10.1016/J.TCB.2012.04.006>.

1083 Ravi, V.M., Neidert, N., Will, P., Joseph, K., Maier, J.P., Kückelhaus, J., Vollmer, L., Goeldner,  
1084 J.M., Behringer, S.P., Scherer, F., et al. (2022). T-cell dysfunction in the glioblastoma  
1085 microenvironment is mediated by myeloid cells releasing interleukin-10. *Nature Communications*  
1086 2022 13:1 13, 1–16. <https://doi.org/10.1038/s41467-022-28523-1>.

1087 Sekiya, S., and Suzuki, A. (2011). Direct conversion of mouse fibroblasts to hepatocyte-like cells  
1088 by defined factors. *Nature* 475, 390–393. <https://doi.org/10.1038/nature10263>.

1089 Stein, C., Bardet, A.F., Roma, G., Bergling, S., Clay, I., Ruchti, A., Agarinis, C., Schmelzle, T.,  
1090 Bouwmeester, T., Schübeler, D., et al. (2015). YAP1 Exerts Its Transcriptional Control via TEAD-  
1091 Mediated Activation of Enhancers. *PLOS Genetics* 11, e1005465.  
1092 <https://doi.org/10.1371/journal.pgen.1005465>.

1093 Takahashi, K., and Yamanaka, S. (2006). Induction of Pluripotent Stem Cells from Mouse  
1094 Embryonic and Adult Fibroblast Cultures by Defined Factors. *Cell* 126, 663–676.  
1095 <https://doi.org/10.1016/j.cell.2006.07.024>.

1096 Trapnell, C., Cacchiarelli, D., Grimsby, J., Pokharel, P., Li, S., Morse, M., Lennon, N.J., Livak,  
1097 K.J., Mikkelsen, T.S., and Rinn, J.L. (2014). The dynamics and regulators of cell fate decisions  
1098 are revealed by pseudotemporal ordering of single cells. *Nat Biotechnol* 32, 381–386.  
1099 <https://doi.org/10.1038/nbt.2859>.

1100 Velazquez, F.N., Caputto, B.L., and Boussin, F.D. (2015). c-Fos importance for brain  
1101 development. *Aging* 7, 1028–1029. <https://doi.org/10.18632/aging.100862>.

1102 Vierbuchen, T., Ling, E., Cowley, C.J., Couch, C.H., Wang, X., Harmin, D.A., Roberts, C.W.M.,  
1103 and Greenberg, M.E. (2017). AP-1 Transcription Factors and the BAF Complex Mediate Signal-  
1104 Dependent Enhancer Selection. *Molecular Cell* 68, 1067-1082.e12.  
1105 <https://doi.org/10.1016/J.MOLCEL.2017.11.026>.

1106 Wang, H., Yang, Y., Qian, Y., Liu, J., and Qian, L. (2022). Delineating chromatin accessibility re-  
1107 patterning at single cell level during early stage of direct cardiac reprogramming. *Journal of*  
1108 *Molecular and Cellular Cardiology* 162, 62–71. <https://doi.org/10.1016/J.YJMCC.2021.09.002>.

1109 Weinreb, C., Rodriguez-Fraticelli, A., Camargo, F.D., and Klein, A.M. (2020). Lineage tracing on  
1110 transcriptional landscapes links state to fate during differentiation. *Science* (1979) 367.  
1111 <https://doi.org/10.1126/SCIENCE.AAW3381>.

1112 Wolf, F.A., Hamey, F.K., Plass, M., Solana, J., Dahlin, J.S., Göttgens, B., Rajewsky, N., Simon,  
1113 L., and Theis, F.J. (2019). PAGA: graph abstraction reconciles clustering with trajectory inference  
1114 through a topology preserving map of single cells. *Genome Biology* 20, 59.  
1115 <https://doi.org/10.1186/s13059-019-1663-x>.

1116 Xing, Q.R., el Farran, C.A., Gautam, P., Chuah, Y.S., Warriar, T., Toh, C.X.D., Kang, N.Y., Sugii,  
1117 S., Chang, Y.T., Xu, J., et al. (2020). Diversification of reprogramming trajectories revealed by  
1118 parallel single-cell transcriptome and chromatin accessibility sequencing. *Science Advances* 6,  
1119 18. [https://doi.org/10.1126/SCIADV.ABA1190/SUPPL\\_FILE/ABA1190\\_SM.PDF](https://doi.org/10.1126/SCIADV.ABA1190/SUPPL_FILE/ABA1190_SM.PDF).

1120 Yimlamai, D., Christodoulou, C., Galli, G.G., Yanger, K., Pepe-Mooney, B., Gurung, B., Shrestha,  
1121 K., Cahan, P., Stanger, B.Z., and Camargo, F.D. (2014). Hippo pathway activity influences liver  
1122 cell fate. *Cell* 157, 1324–1338. <https://doi.org/10.1016/j.cell.2014.03.060>.

1123 Yui, S., Azzolin, L., Maimets, M., Pedersen, M.T., Fordham, R.P., Hansen, S.L., Larsen, H.L.,  
1124 Guiu, J., Alves, M.R.P., Rundsten, C.F., et al. (2018). YAP/TAZ-Dependent Reprogramming of  
1125 Colonic Epithelium Links ECM Remodeling to Tissue Regeneration. *Cell Stem Cell* 22, 35-49.e7.  
1126 <https://doi.org/10.1016/j.stem.2017.11.001>.

1127 Zanconato, F., Forcato, M., Battilana, G., Azzolin, L., Quaranta, E., Bodega, B., Rosato, A.,  
1128 Bicciato, S., Cordenonsi, M., and Piccolo, S. (2015). Genome-wide association between  
1129 YAP/TAZ/TEAD and AP-1 at enhancers drives oncogenic growth. *Nature Cell Biology* 17, 1218–  
1130 1227. <https://doi.org/10.1038/ncb3216>.

1131

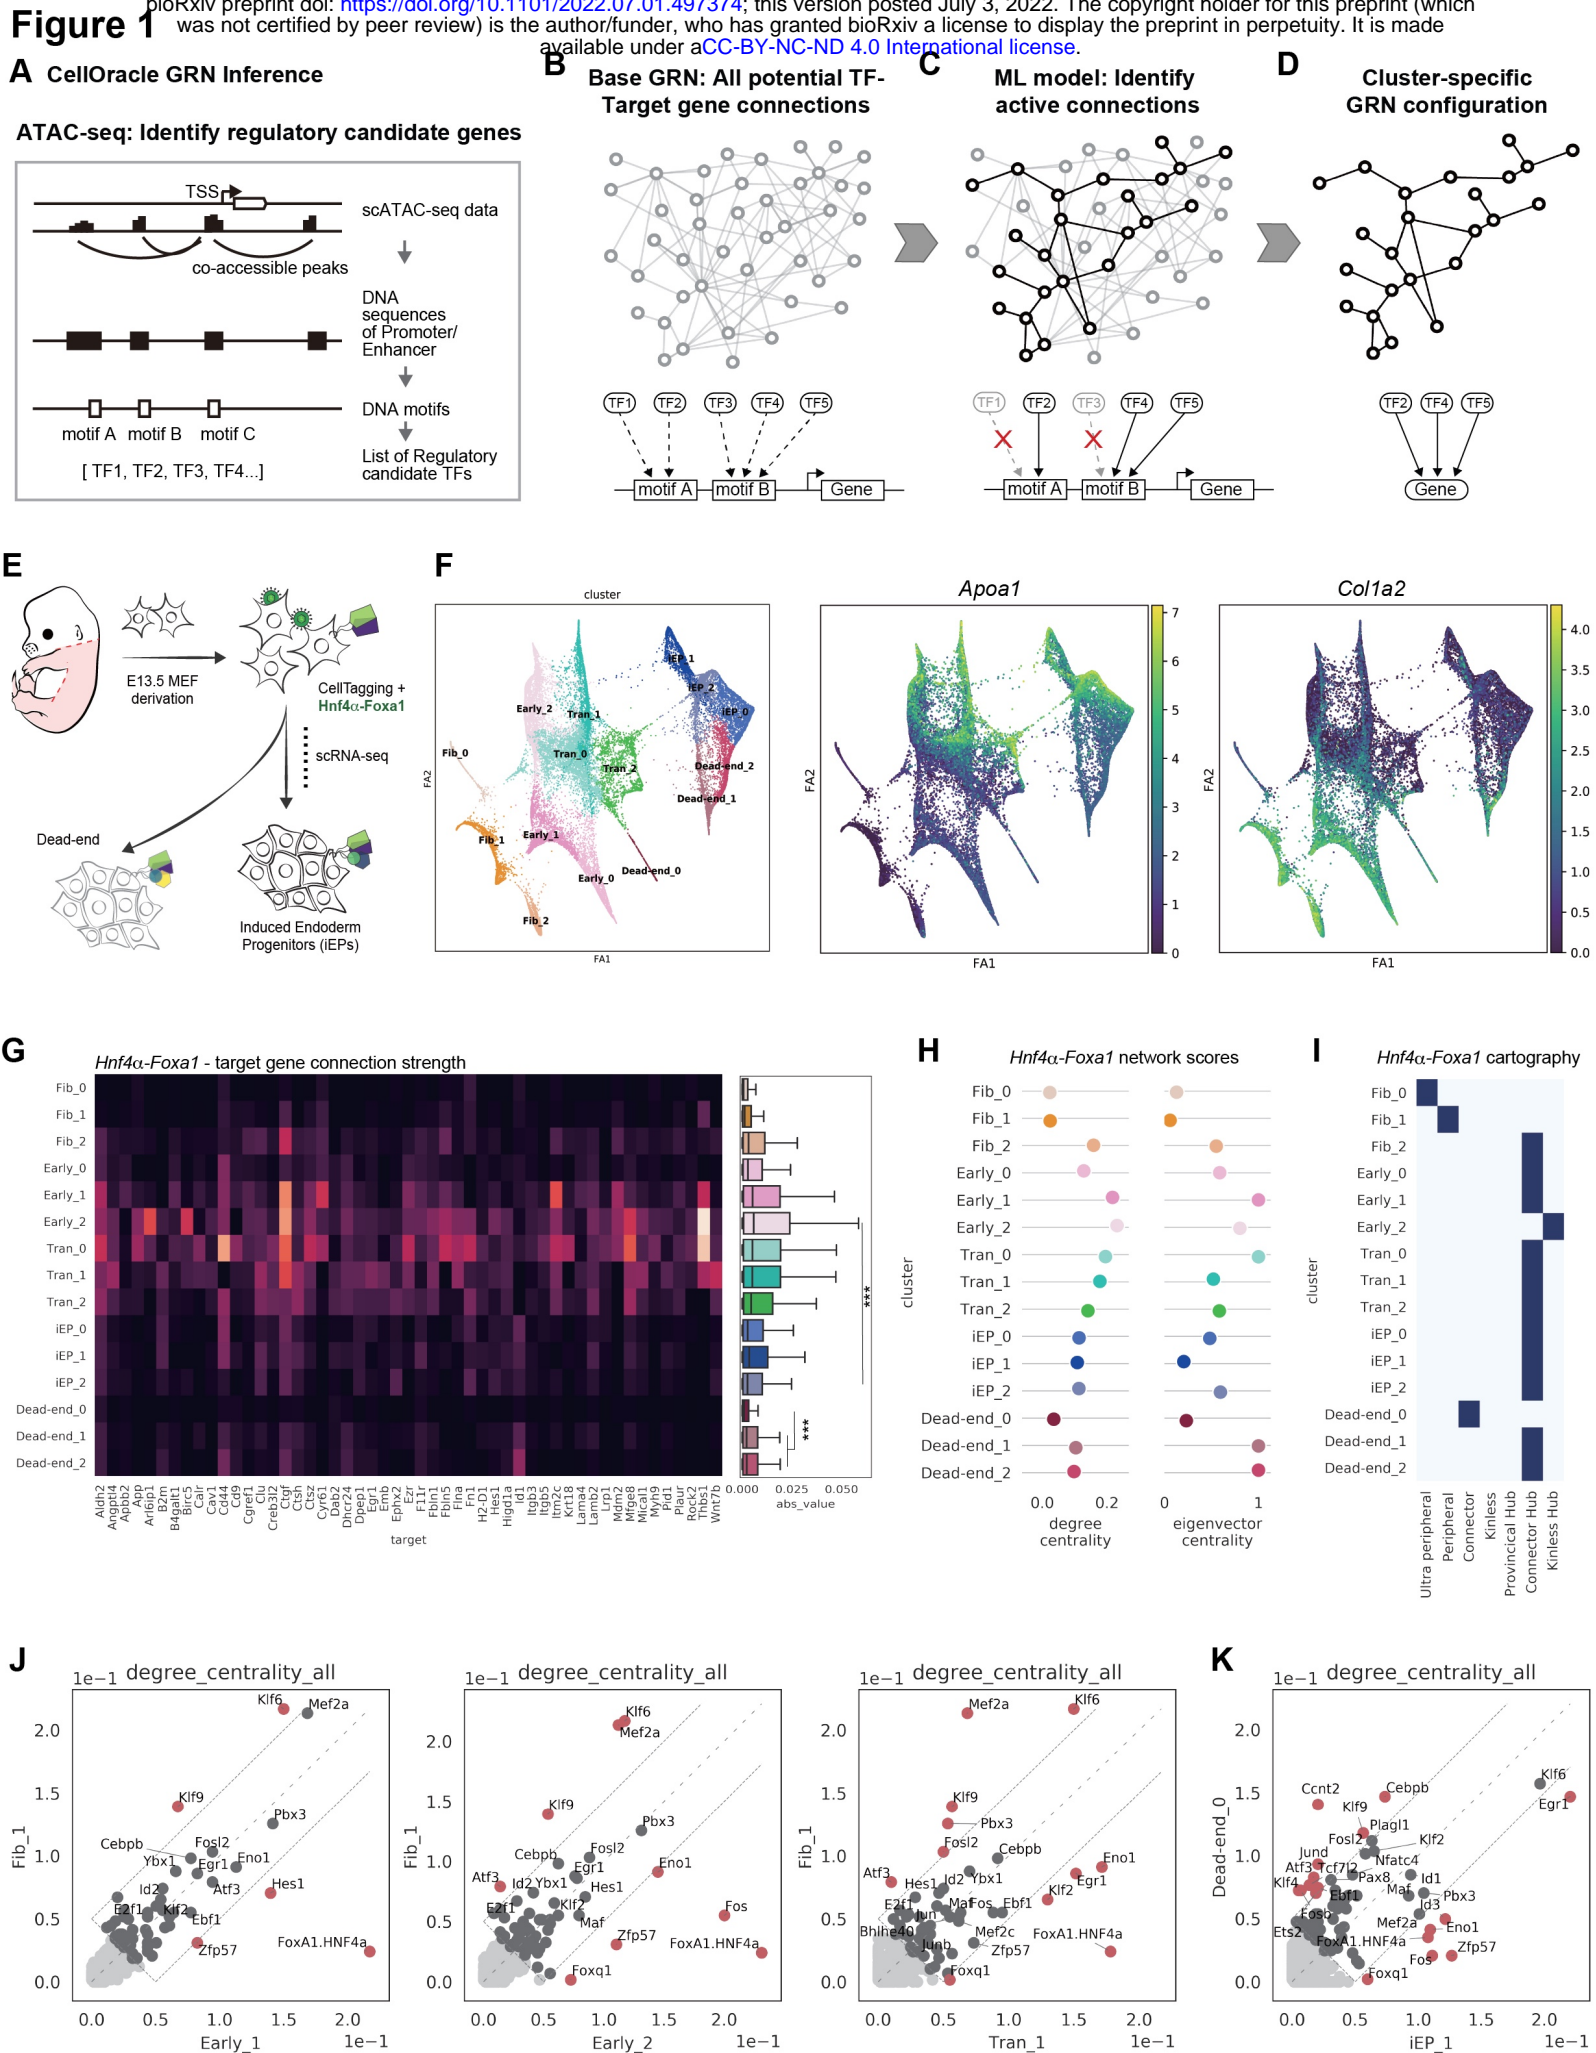

**A**

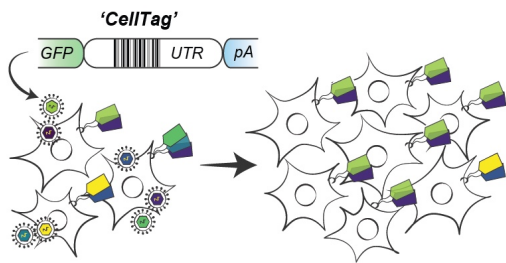

**B state-rate analysis**

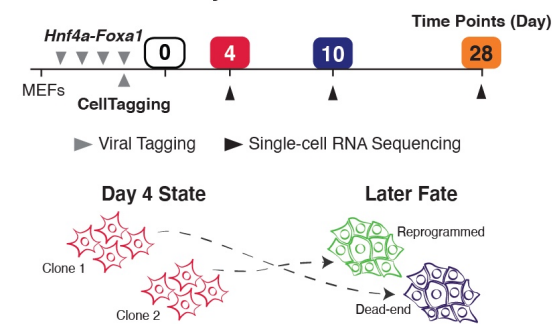

**C Time point**

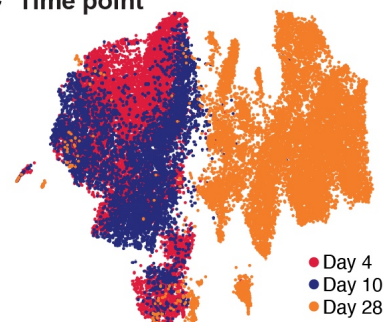

**D Fibroblast identity**

**iEP identity**

**Dead-end identity**

**E**

**Reprogramming**

**Dead-end**

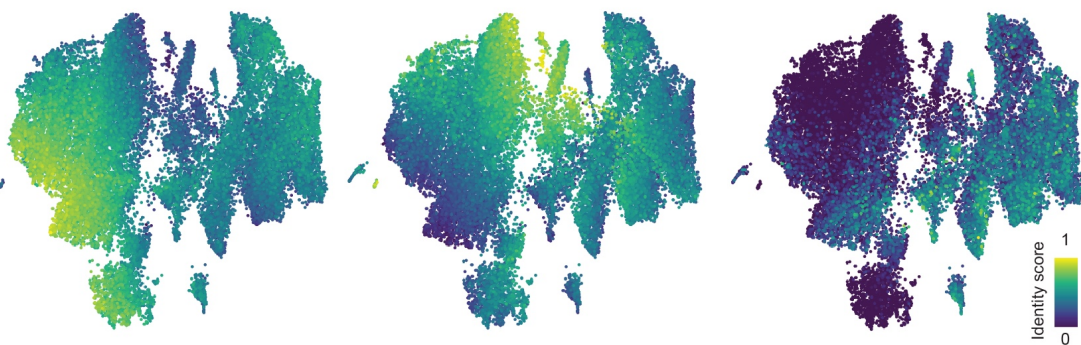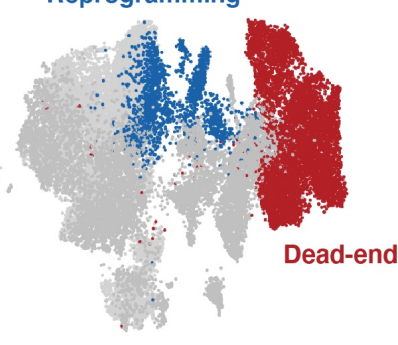

**F**

**Day 4**

**Day 10**

**Day 28**

**All days**

**iEP-enriched clones**

n = 64 cells

n = 204 cells

n = 611 cells

n = 879 cells

**iEP-depleted clones**

n = 59 cells

n = 805 cells

n = 4,091 cells

n = 4,955 cells

**Reprogramming**

**Dead-end**

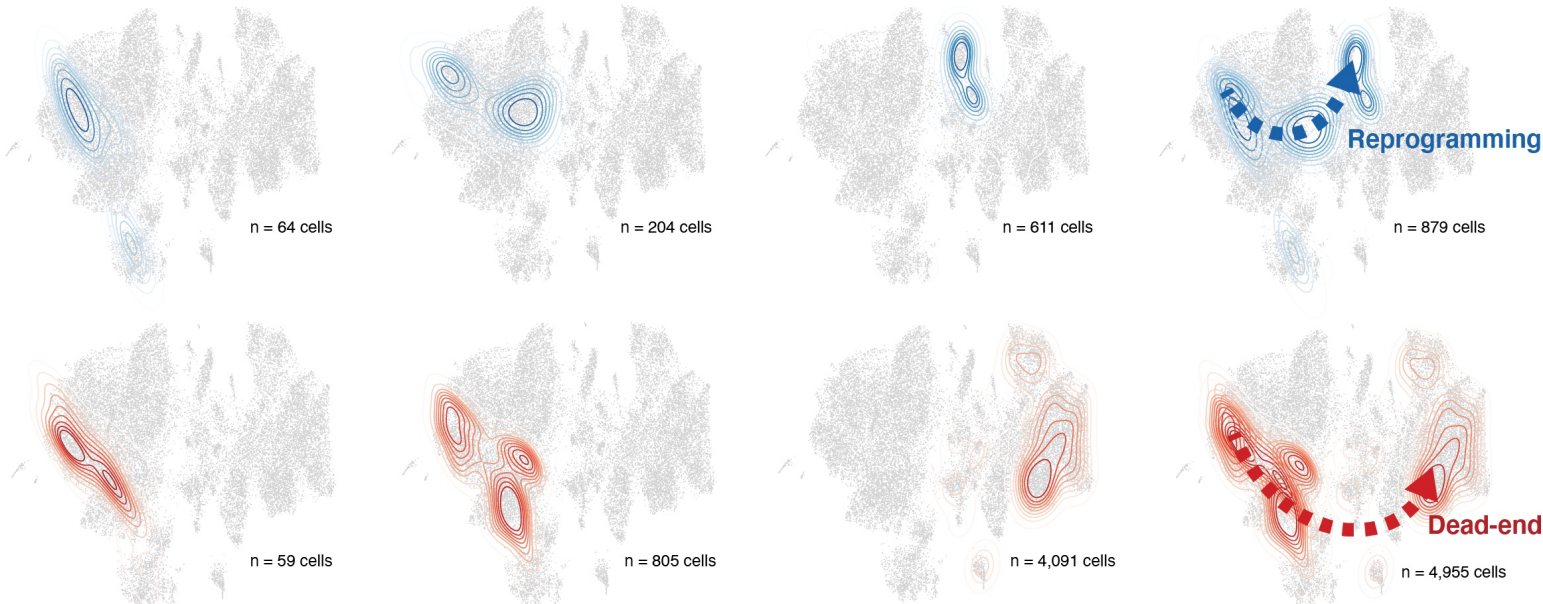

**G Degree centrality**

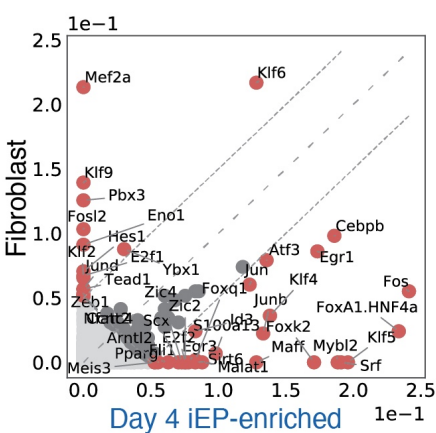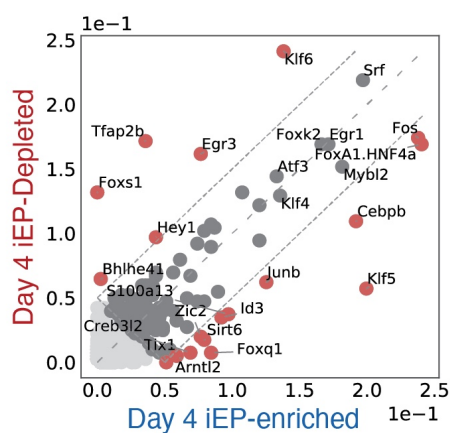

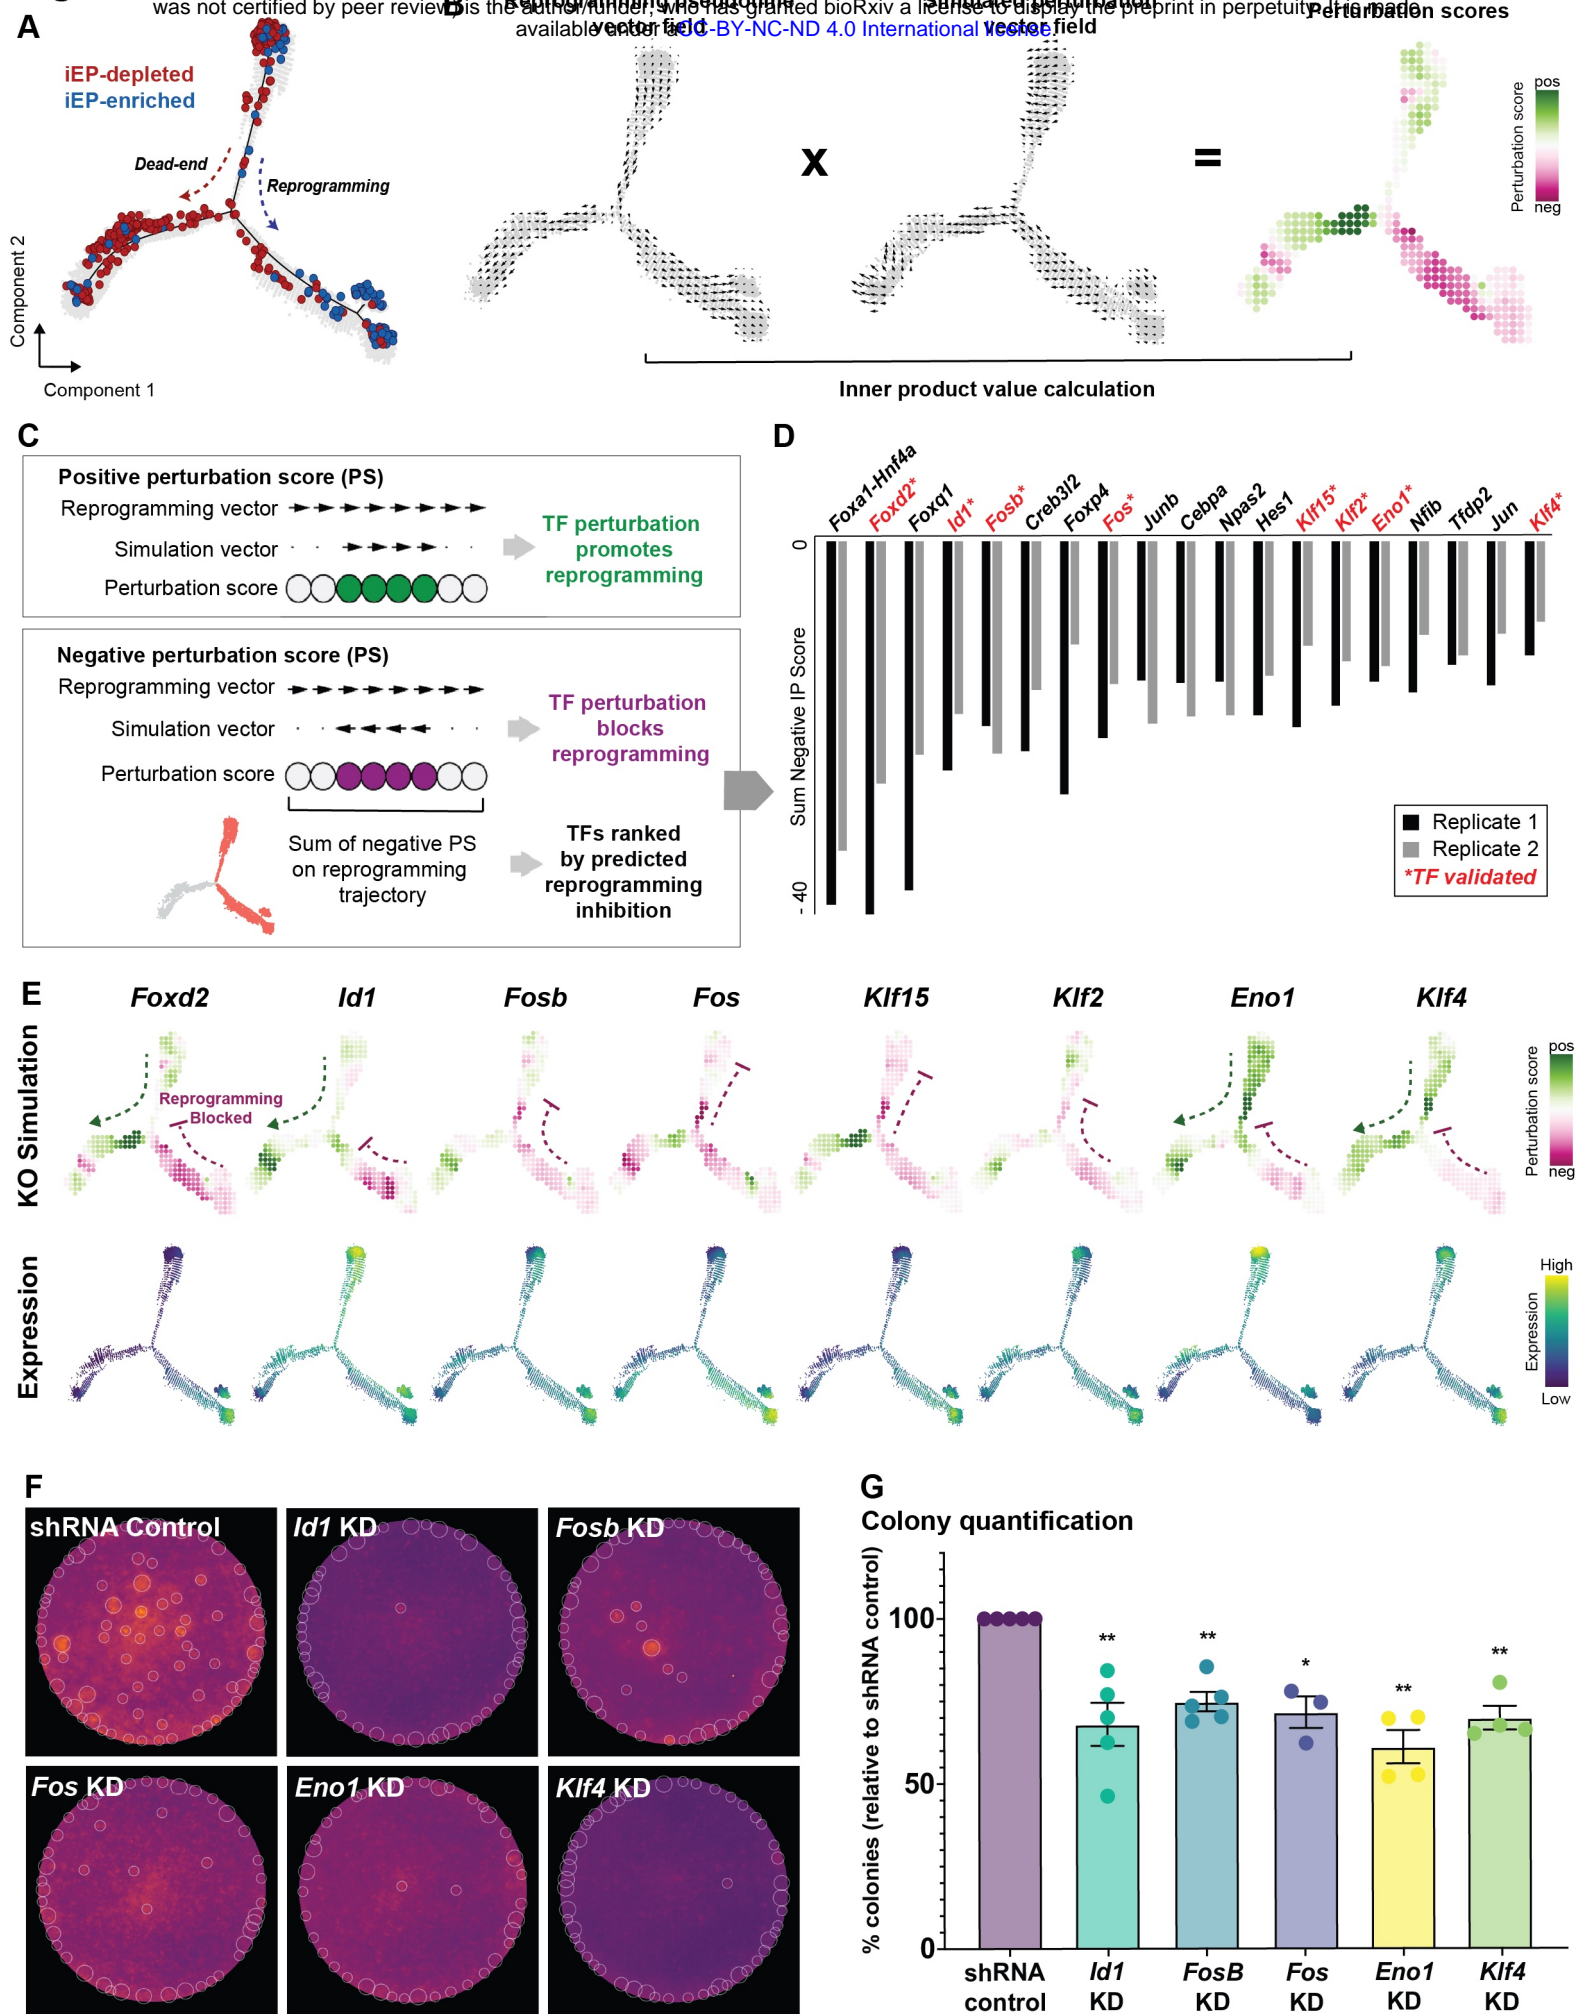

# Figure 4

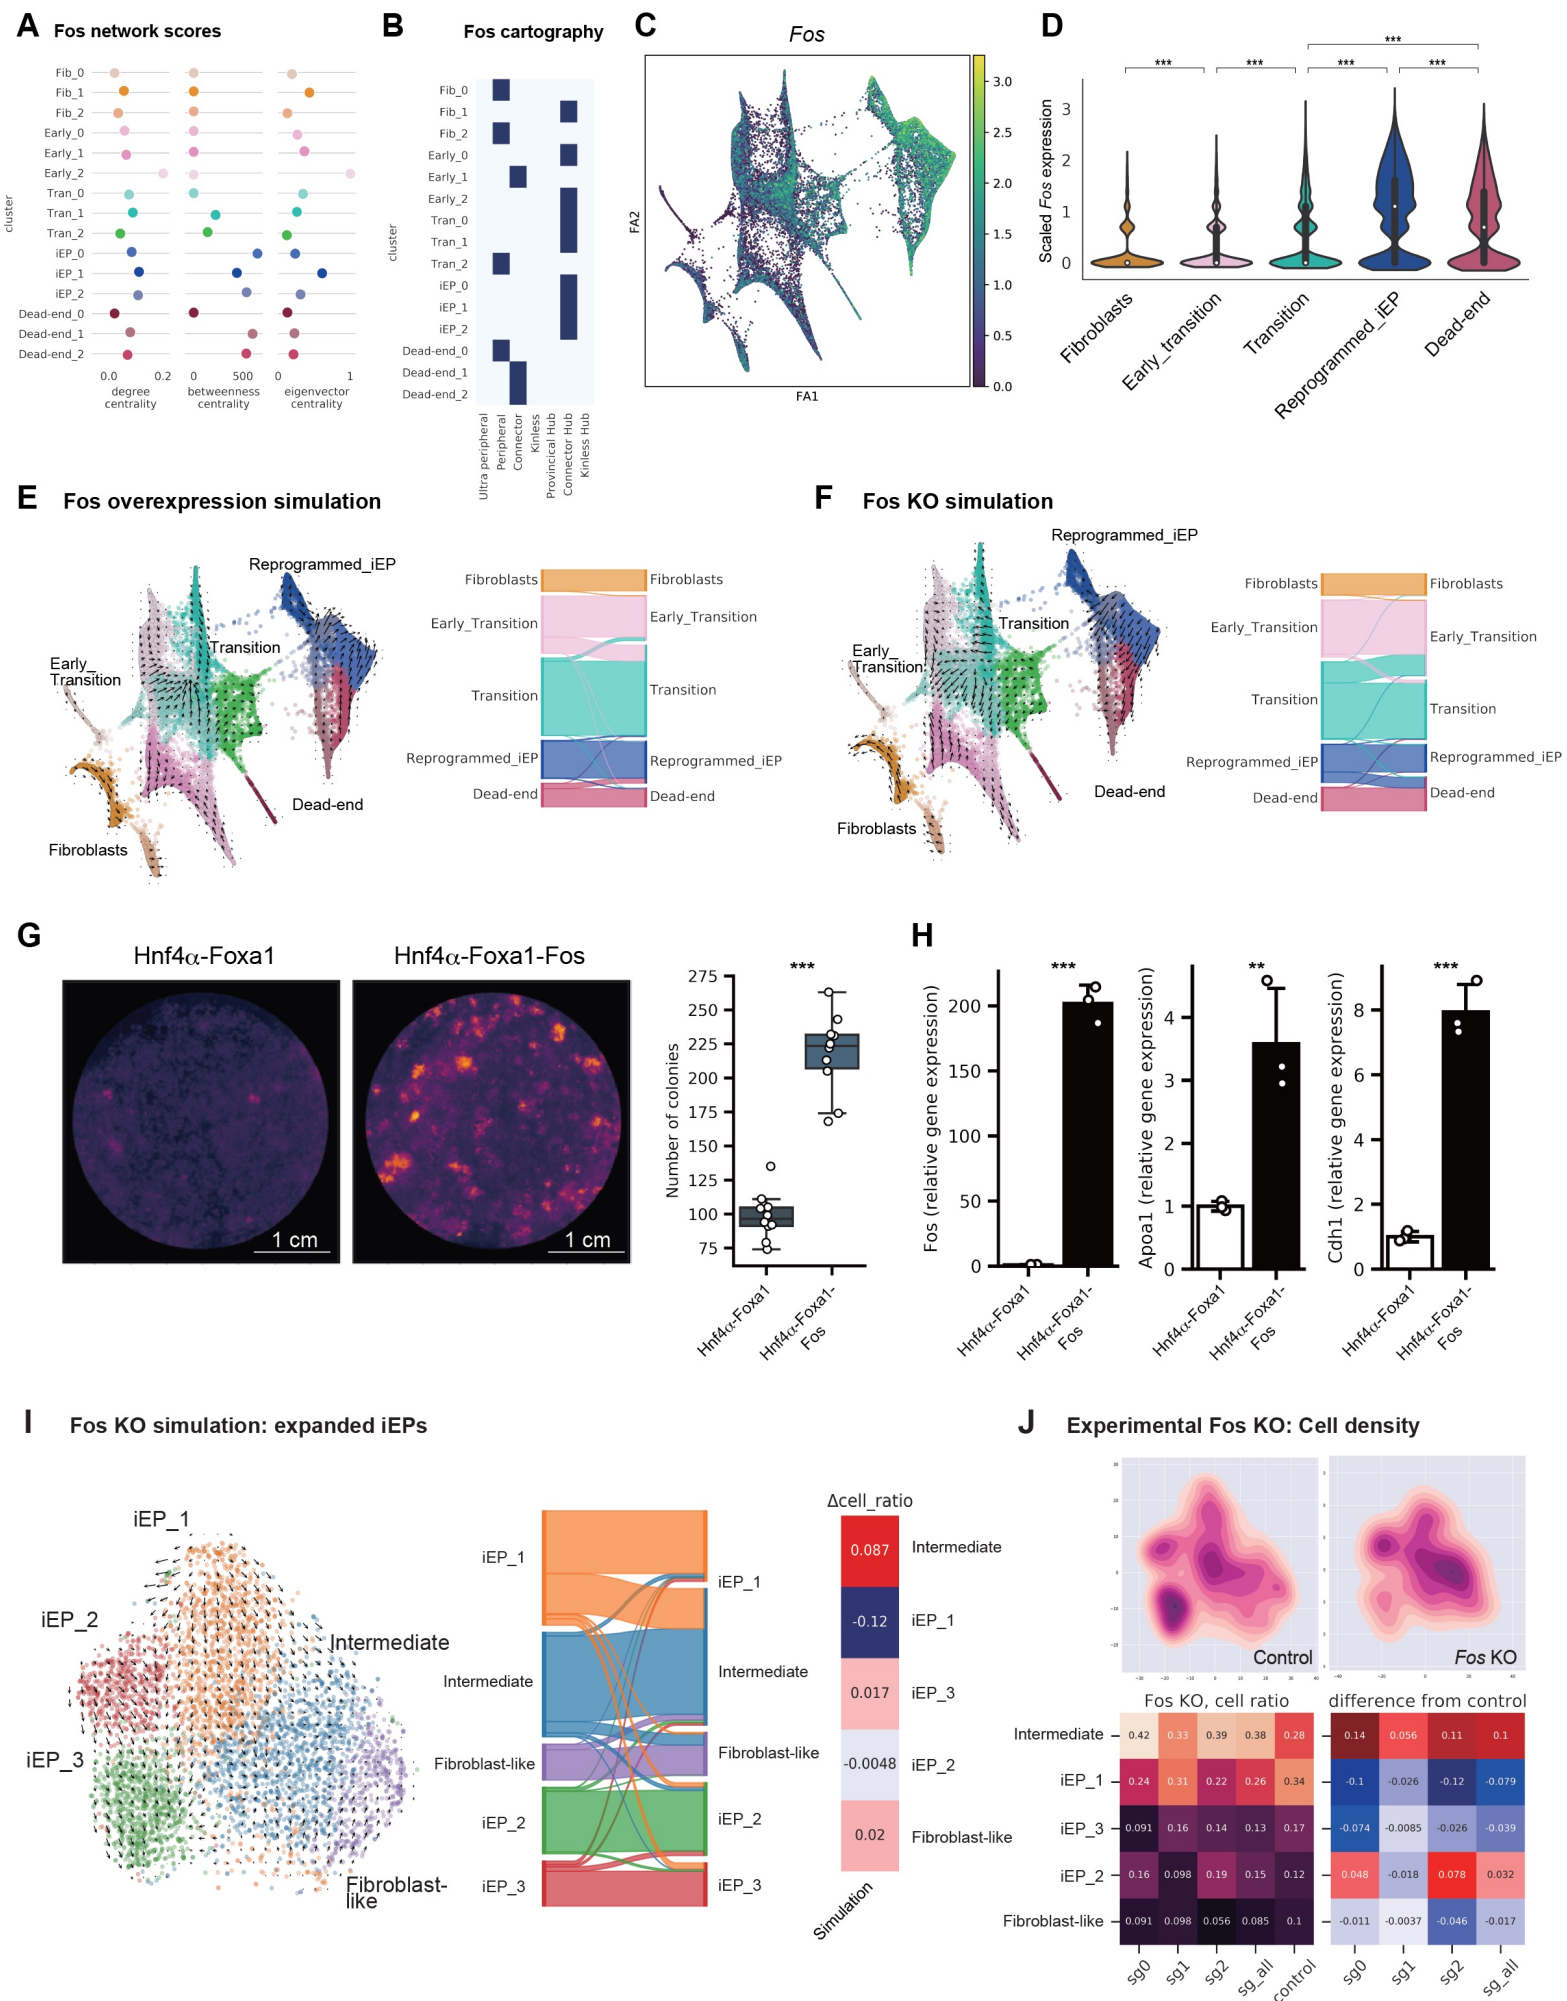

# Figure 5

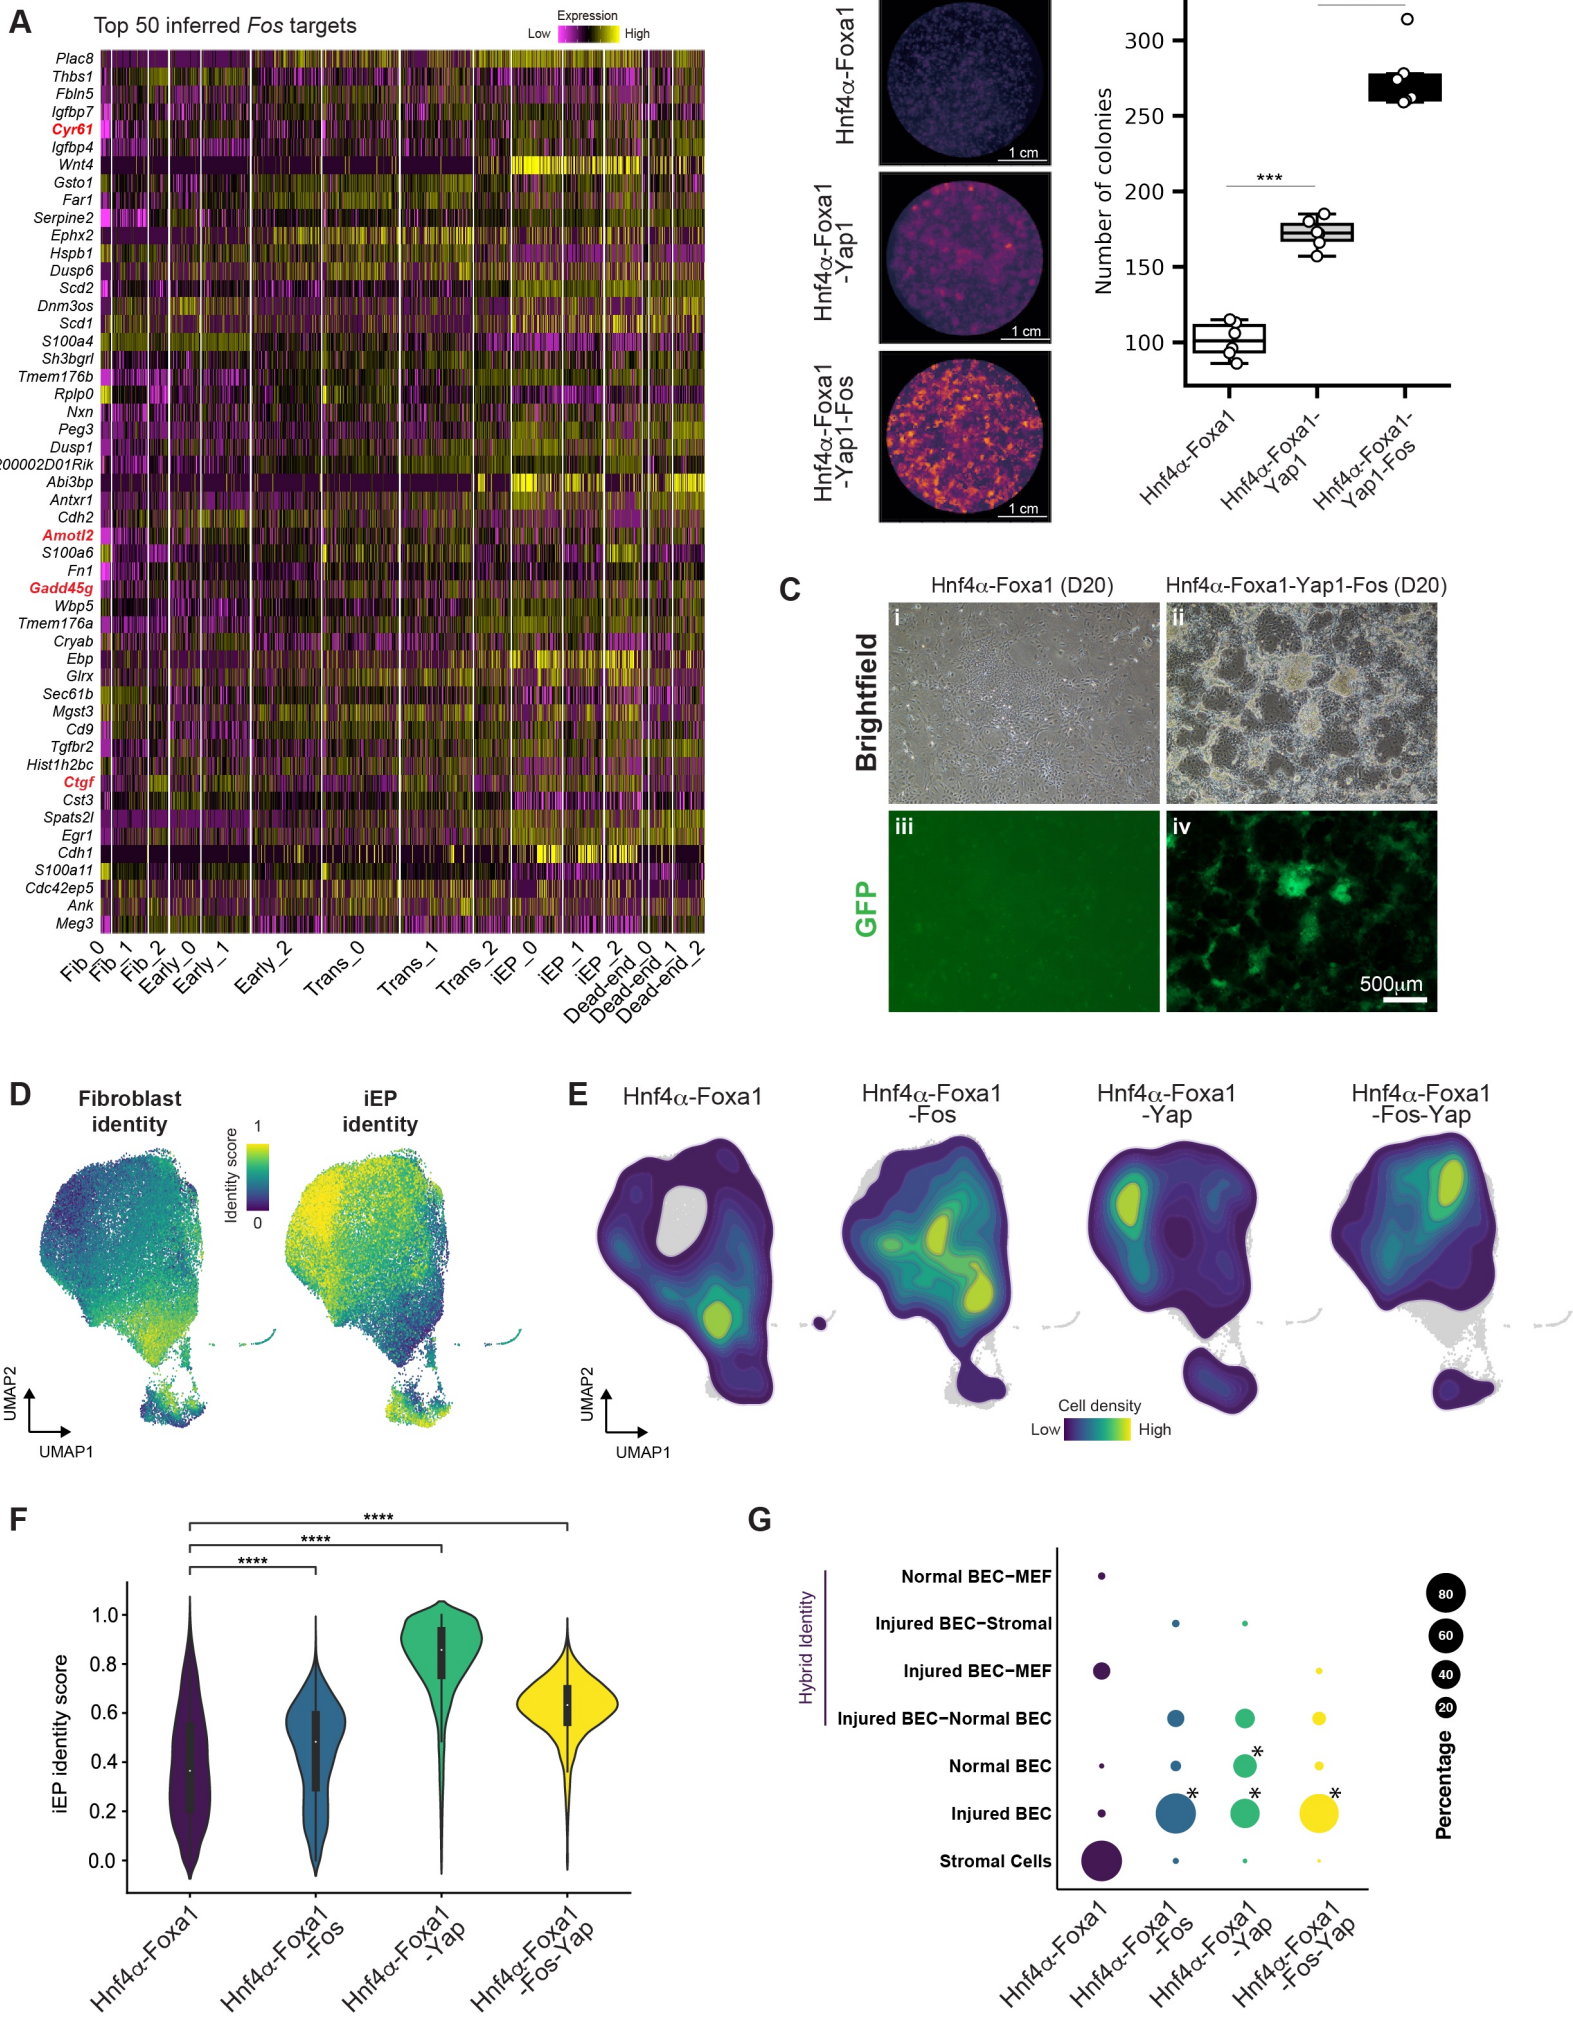

**A** ATAC-seq: Identify regulatory candidate genes

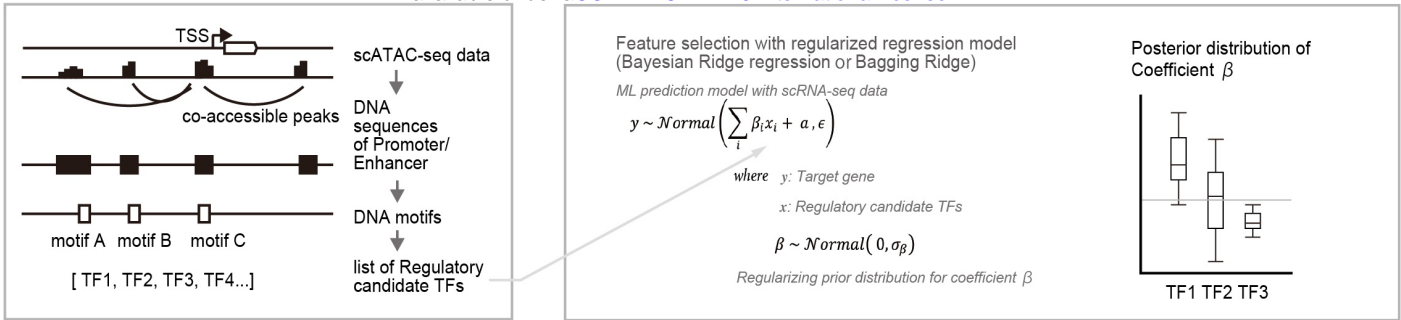

**B**

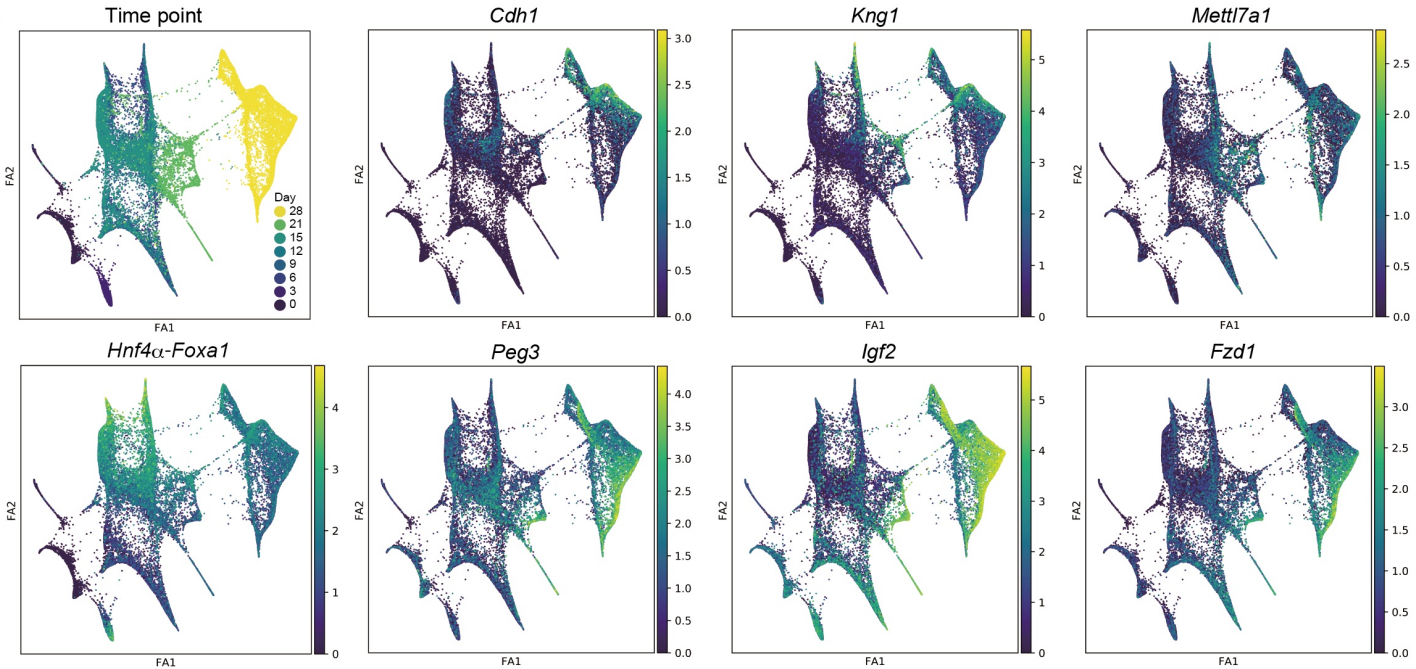

**C**

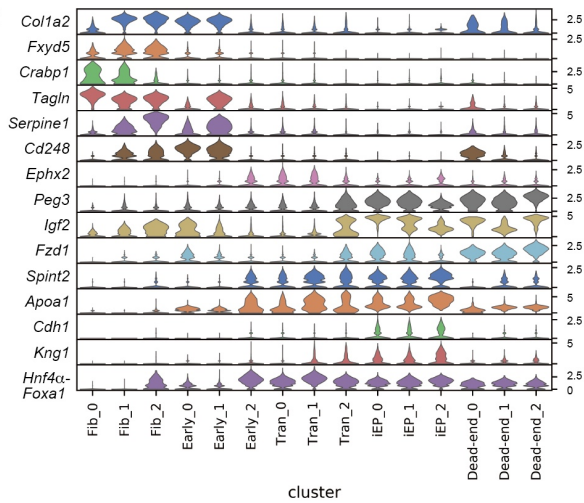

**D**

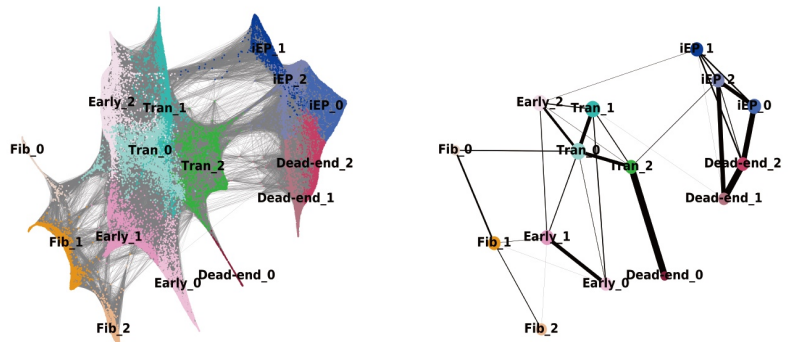

**E**

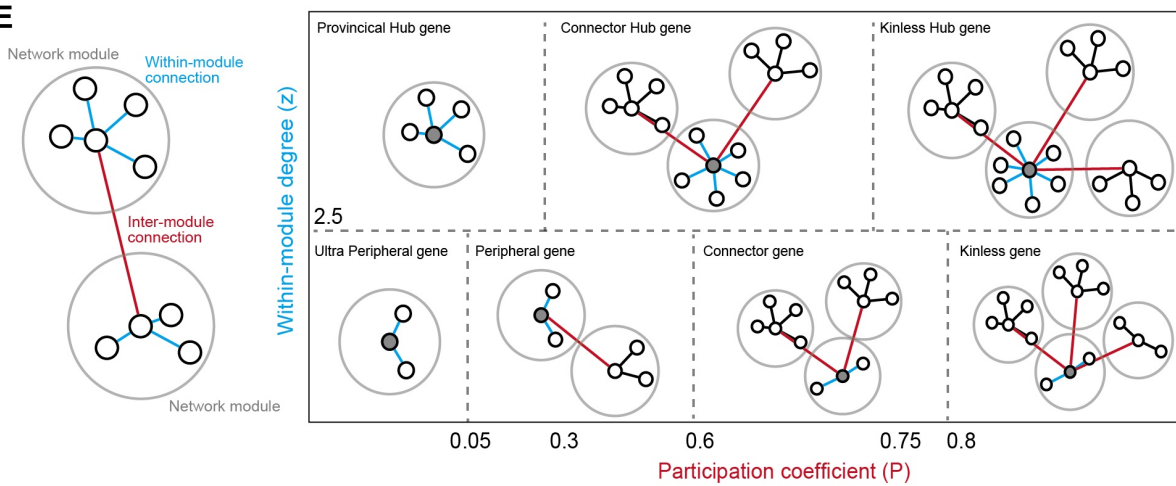

**F** Clonal composition

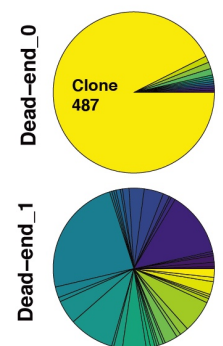



## Supplementary Figure 2

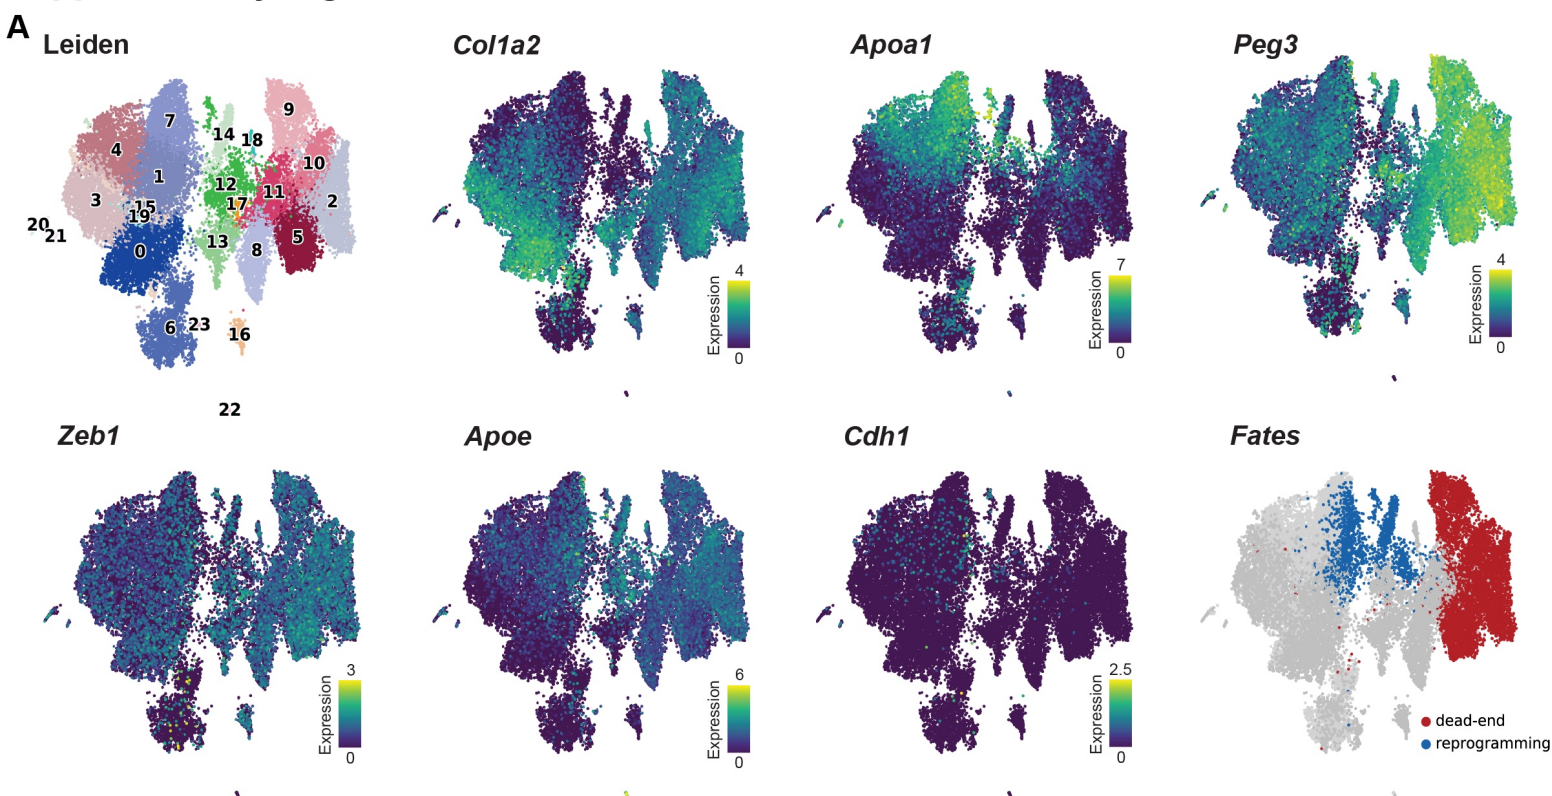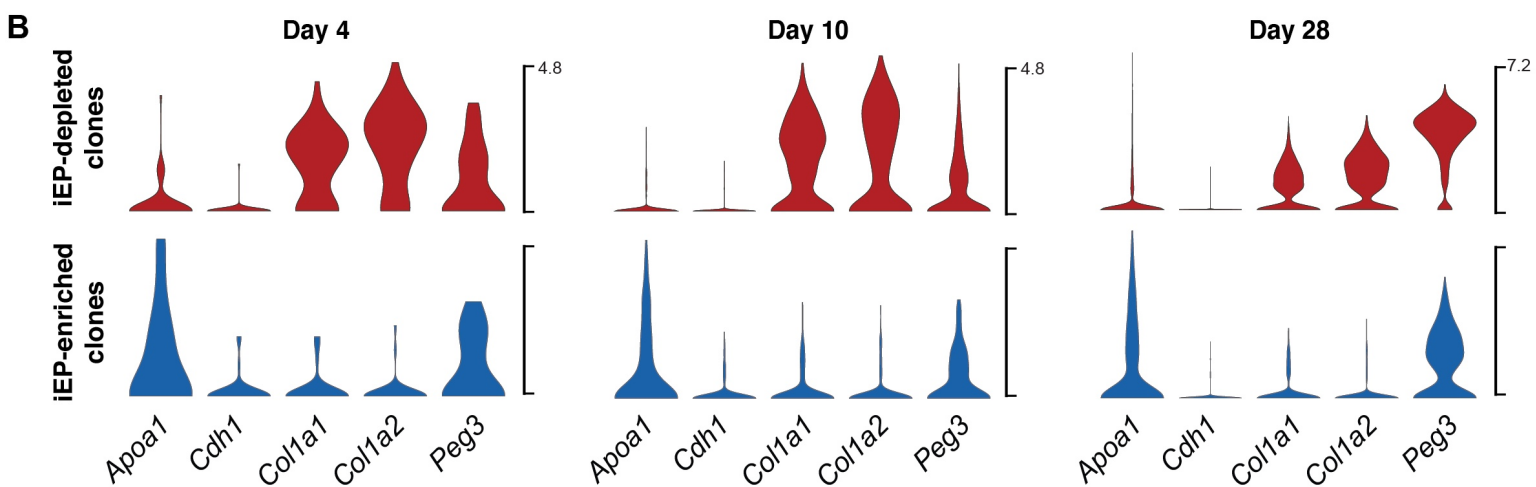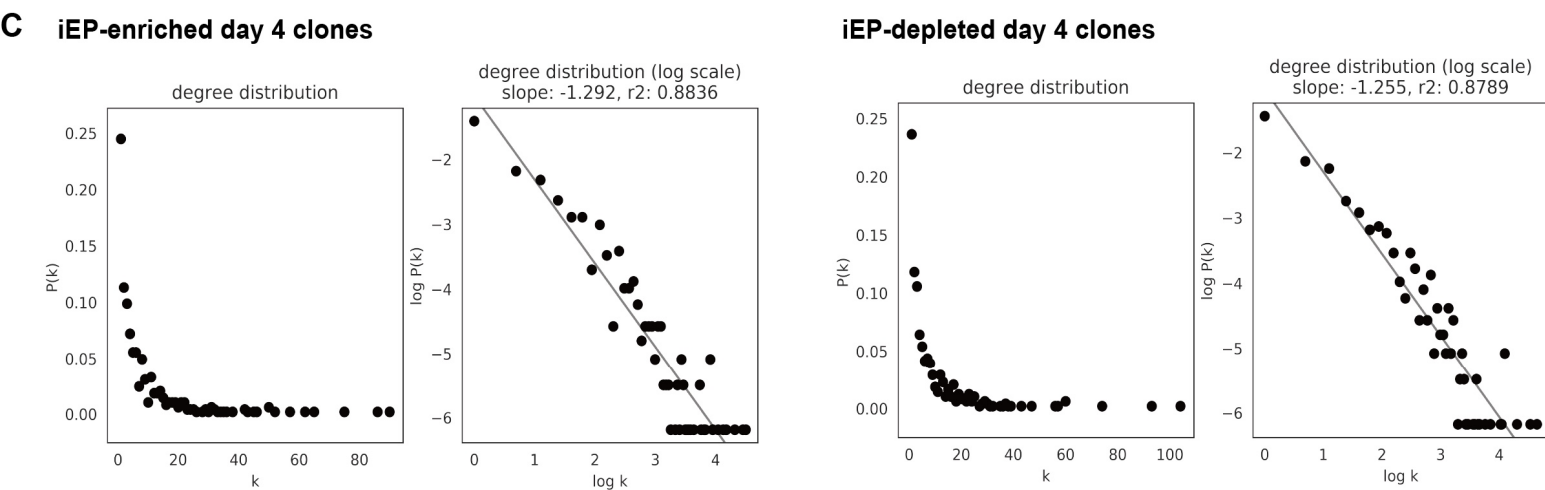

## Supplemental Figure 3

**A**

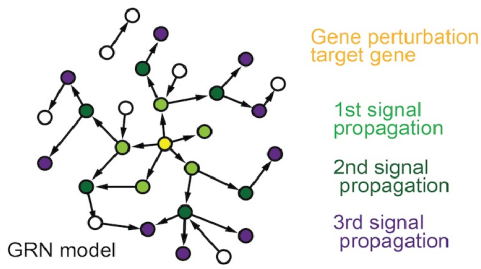

**C**

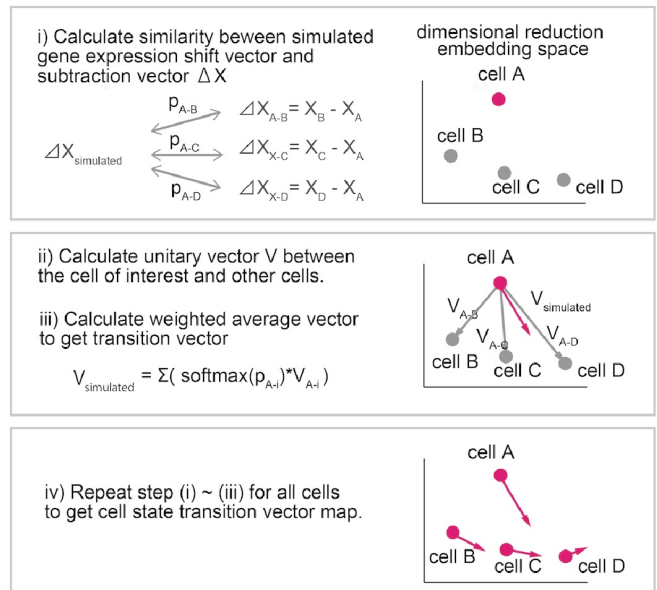

**B**

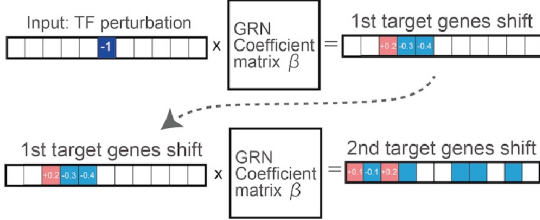

**D**

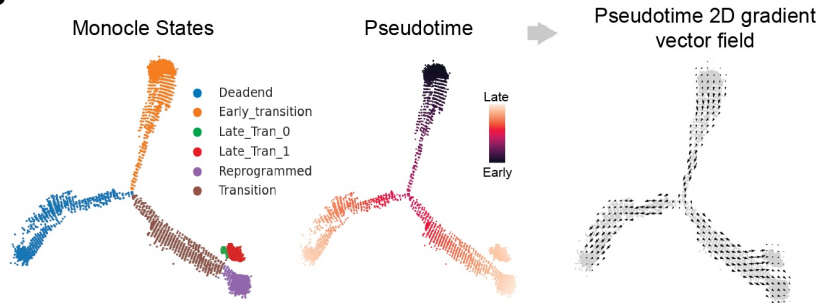

**F**

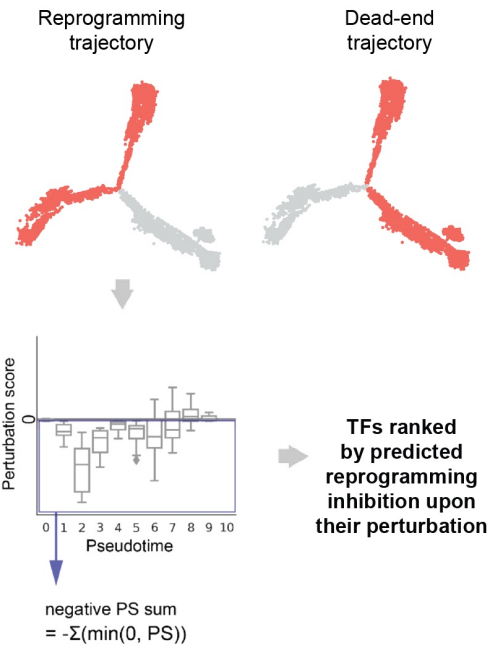

**E**

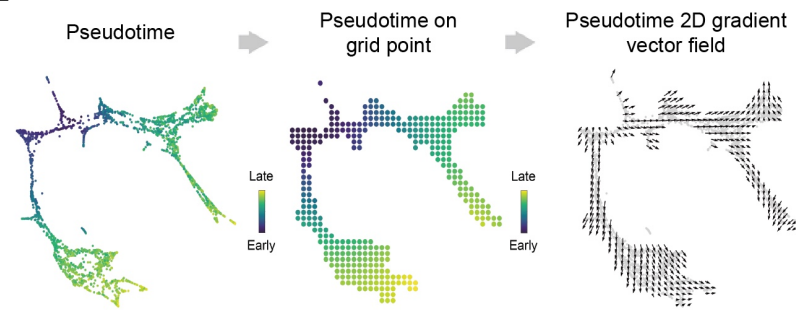

**G**

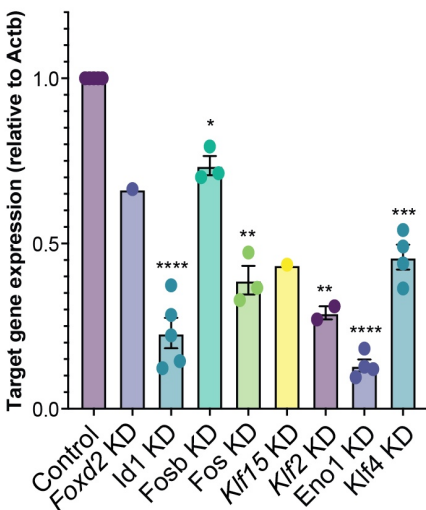

**H**

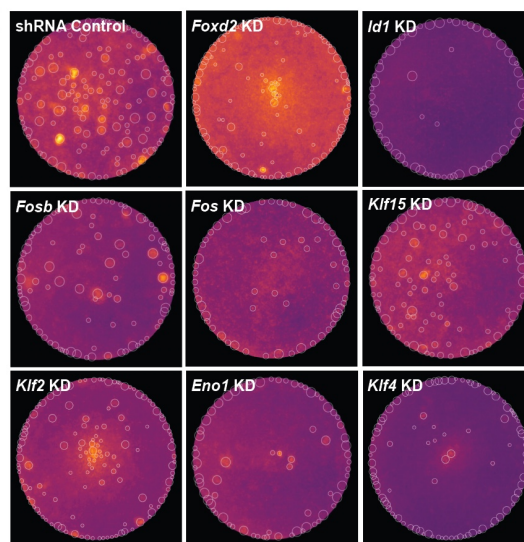

**I** Initial colony formation screening

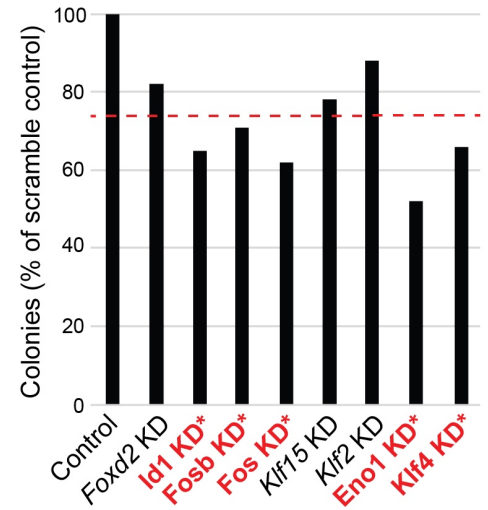

## Supplemental Figure 4

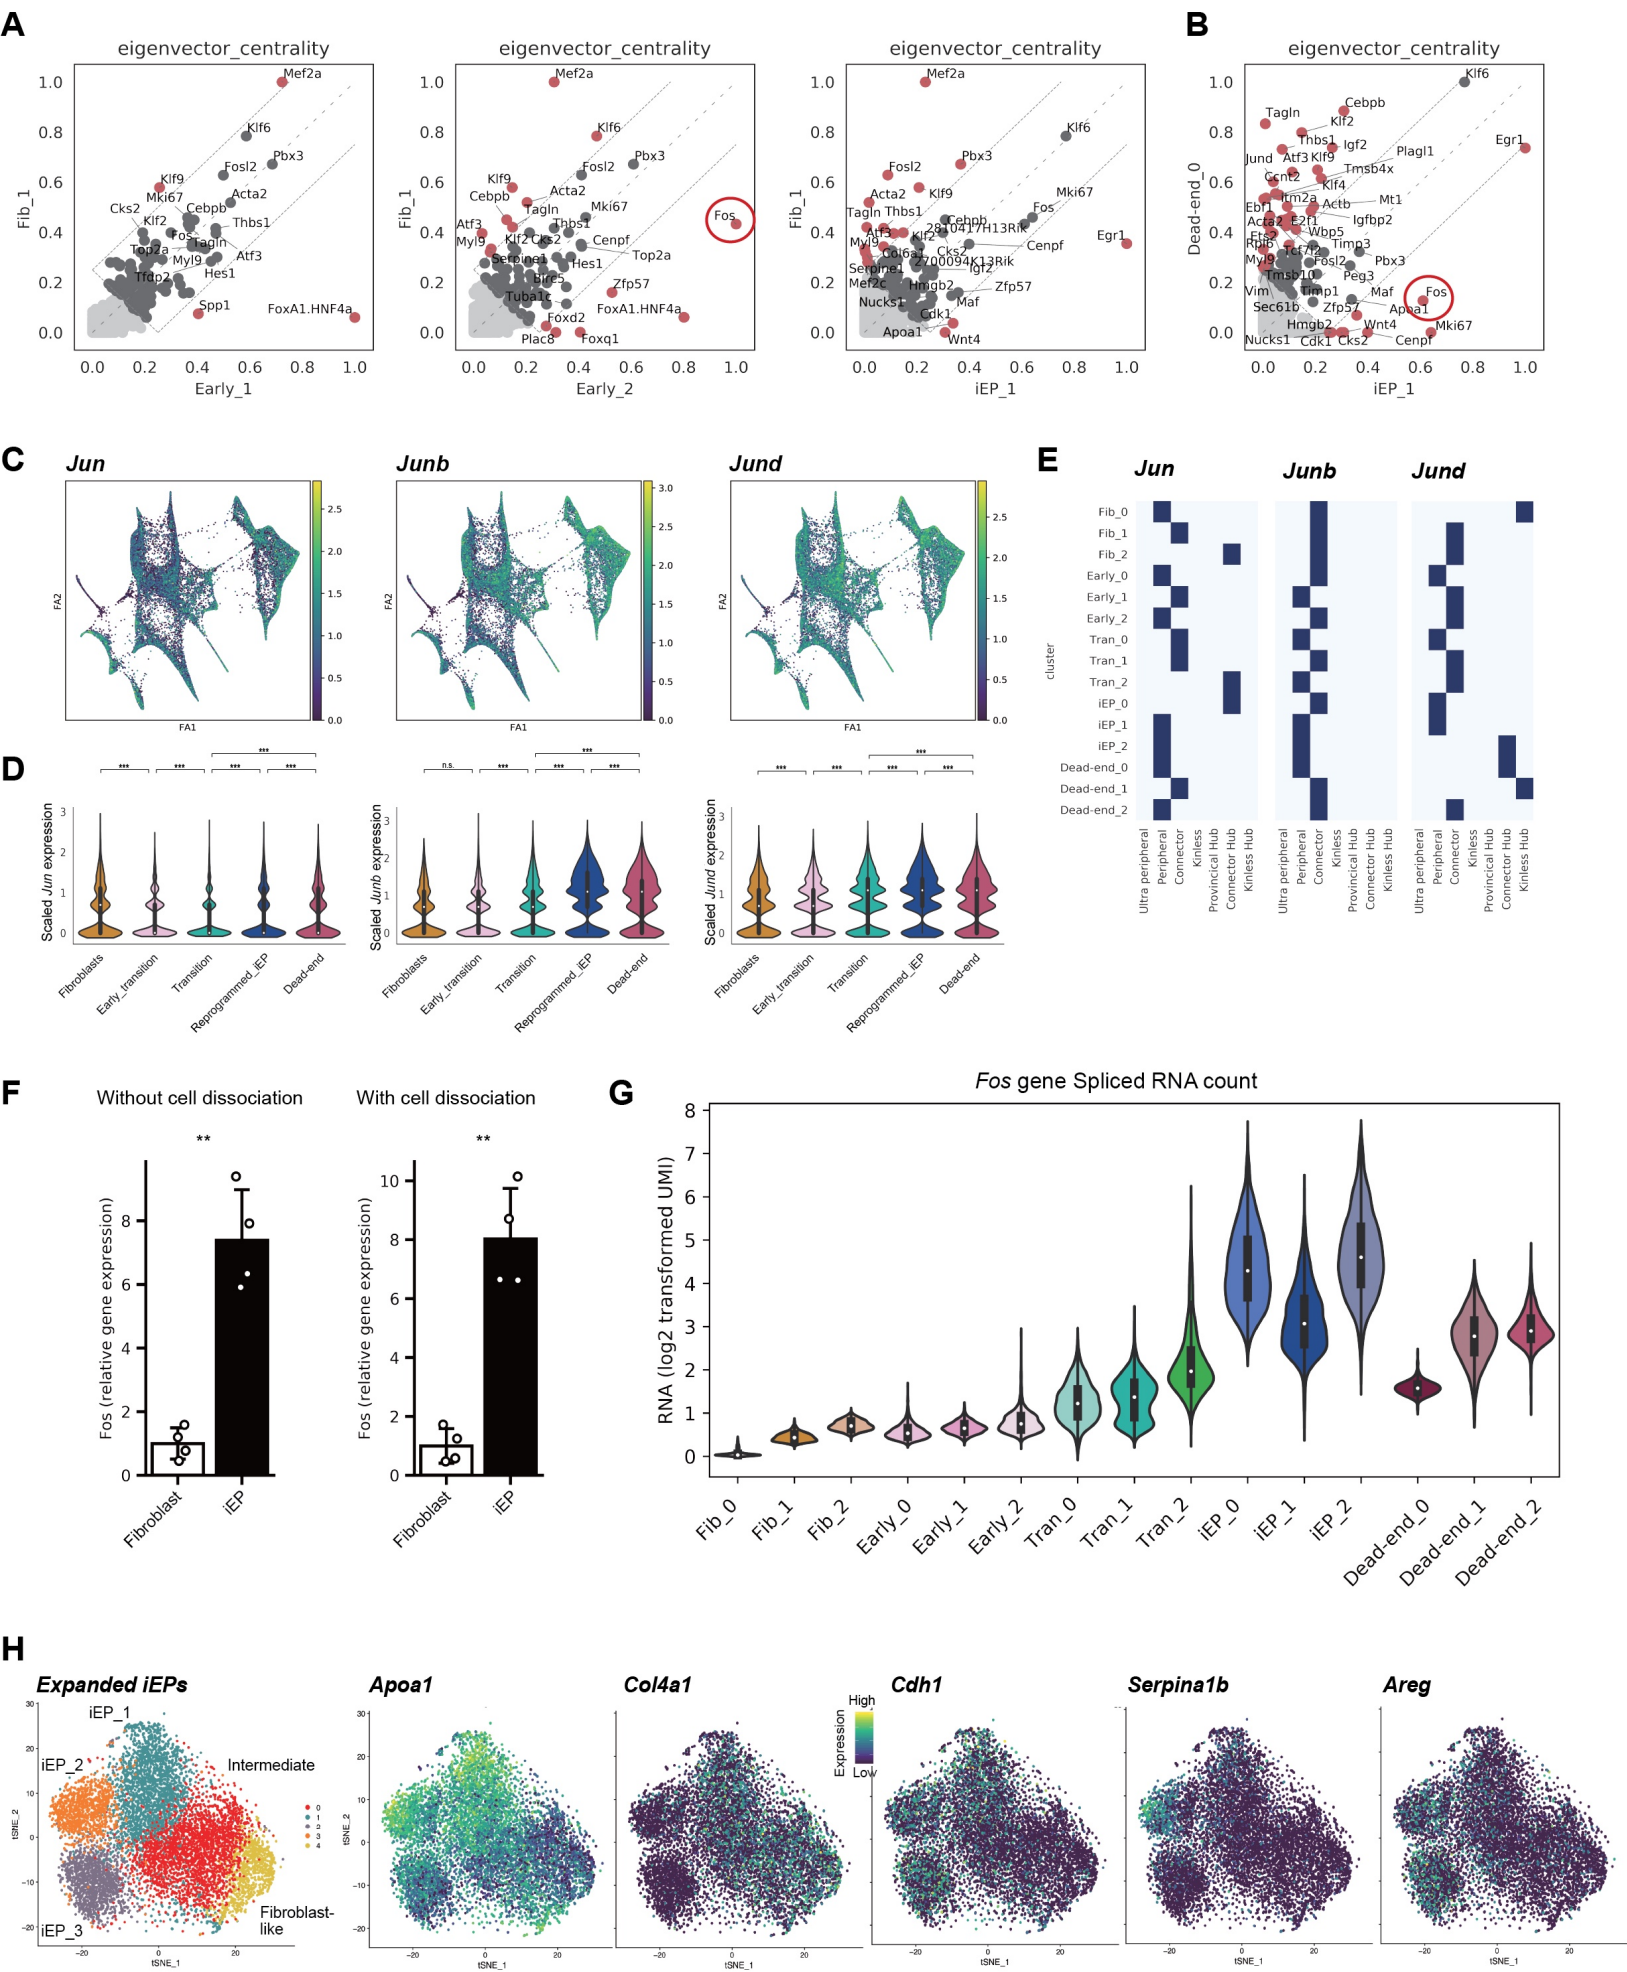

## Supplemental Figure 5

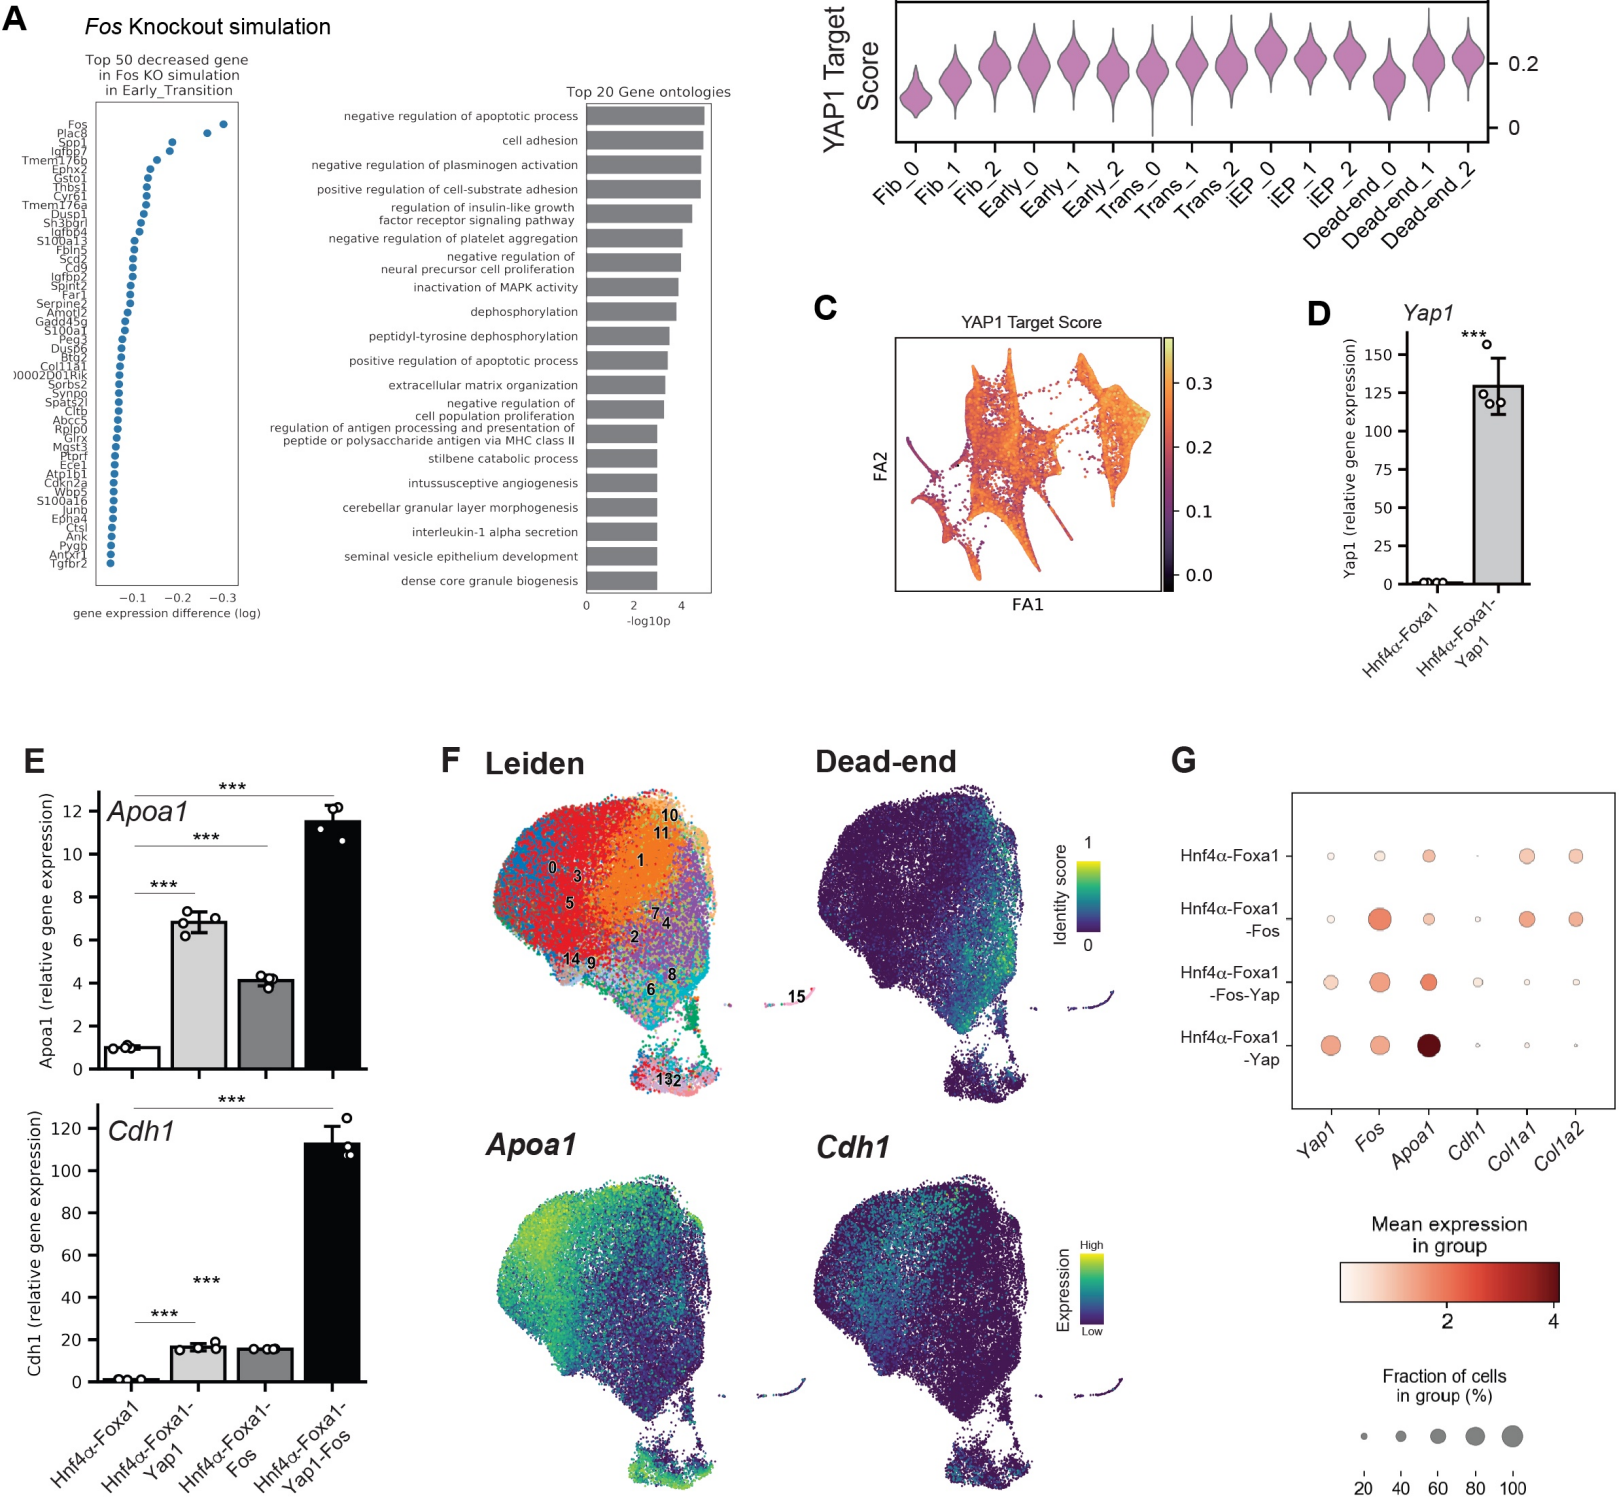

Source: https://www.biorxiv.org/content/10.1101/2022.07.01.497374v1.full.pdf
